# Supplementary material for: Efficacy and Key Materials of East Asian Herbal Medicine Combined with Conventional Medicine on Inflammatory Skin Lesion in Patients with Psoriasis Vulgaris: A Meta-Analysis, Integrated Data Mining, and Network Pharmacology
Source: Pharmaceuticals (Basel). 2023 Aug 15;16(8):1160. doi: 10.3390/ph16081160 (PMC10459676; doi:10.3390/ph16081160)
Supplement: Supplementary file 1 [file pharmaceuticals-16-01160-s001.zip]

Archive with 6 entries (6 files):
- Supplementary figure S1A-E.pdf
- Supplementary Table S1.pdf
- Supplementary Table S2.pdf
- Supplementary Table S3.xlsx
- Supplementary Table S4.xlsx
- Supplementary Table S5.xlsx
