# Supplementary material for: Efficacy and Key Materials of East Asian Herbal Medicine Combined with Conventional Medicine on Inflammatory Skin Lesion in Patients with Psoriasis Vulgaris: A Meta-Analysis, Integrated Data Mining, and Network Pharmacology
Source: Pharmaceuticals (Basel). 2023 Aug 15;16(8):1160. doi: 10.3390/ph16081160 (PMC10459676; doi:10.3390/ph16081160)
Supplement: Supplementary file 1 [file pharmaceuticals-16-01160-s001.zip › Supplementary Table S3.xlsx]

## Sheet: Sheet1
Supplementary Table S3. Prestige centrality of each of the East Asian herbs used in the clinical trials of 5 percent or more
East Asian herbs	Eigenvector centrality	PageRank centrality
Rehmanniae radix recens	1	0.0284
Glycyrrhizae radix et rhizoma	0.982	0.0278
Paeoniae radix rubra	0.982	0.0278
Salviae miltiorrhizae radix	0.988	0.0277
Smilax glabrae rhizoma	0.988	0.0277
Dictamni radicis cortex	0.968	0.0272
Angelicae sinensis radix	0.974	0.0271
Moutan radicis cortex	0.974	0.0271
Lonicerae flos	0.953	0.0266
Saposhnikoviae radix	0.945	0.0266
Lithospermi radix	0.959	0.0265
Sophorae radix	0.914	0.0254
Cicadidae periostracum	0.923	0.0253
Isatidis folium	0.92	0.0253
Spatholobi caulis	0.92	0.0253
Scutellariae radix	0.895	0.0248
Scrophulariae radix	0.907	0.0247
Schizonepetae spica	0.868	0.0242
Forsythiae fructus	0.874	0.0235
Liriopis seu ophiopogonis tuber	0.871	0.0235
Paeonia lactiflora	0.843	0.023
Sophorae flos	0.824	0.0224
Carthami flos	0.823	0.0224
Hedyotidis herba	0.787	0.022
Gardenia jasminoides	0.798	0.0219
Cnidi rhizoma	0.793	0.0219
Zaocys	0.81	0.0218
Taraxaci herba	0.804	0.0218
Persicae semen	0.779	0.0213
Bubalus bubalis	0.762	0.0207
Tribuli fructus	0.762	0.0207
Imperatae rhizoma	0.736	0.0201
Coptis chinensis	0.719	0.0195
Violae herba	0.718	0.0195
Scutellariae barbatae herba	0.692	0.019
Astragali radix	0.684	0.019
Indigo pulverata levis	0.642	0.0186
Polygoni multiflori radix	0.649	0.0178
Mume fructus	0.601	0.0174
Ecliptae herba	0.615	0.0173
Curcumae rhizoma	0.589	0.0168
Rhei radix et rhizoma	0.556	0.0156
Dioscorea hypoglauca	0.477	0.0139
Arctii fructus	0.442	0.0128
Smilacis chinensis rhizoma	0.338	0.0106
