# Supplementary material for: Efficacy and Key Materials of East Asian Herbal Medicine Combined with Conventional Medicine on Inflammatory Skin Lesion in Patients with Psoriasis Vulgaris: A Meta-Analysis, Integrated Data Mining, and Network Pharmacology
Source: Pharmaceuticals (Basel). 2023 Aug 15;16(8):1160. doi: 10.3390/ph16081160 (PMC10459676; doi:10.3390/ph16081160)
Supplement: Supplementary file 1 [file pharmaceuticals-16-01160-s001.zip › Supplementary Table S4.xlsx]

## Sheet: Sheet1
Supplementary Table S4. Potential gene targets for bioactive compounds from four cour herbs
PubChem CID	Ingredient name	Target protein name	Gene name(Uniprot)	Uniprot ID	Probablity
485077	Dihydrochelerythrine	Sodium channel protein type IX alpha subunit	SCN9A	Q15858	0.10934
485077	Dihydrochelerythrine	X-box-binding protein 1	XBP1	P17861	0.10934
485077	Dihydrochelerythrine	Tyrosine-protein kinase ABL	ABL1	P00519	0.10934
485077	Dihydrochelerythrine	Phosphodiesterase 4B	PDE4B	Q07343	0.10934
485077	Dihydrochelerythrine	Serine/threonine-protein kinase mTOR	MTOR	P42345	0.10934
485077	Dihydrochelerythrine	Hepatocyte growth factor receptor	MET	P08581	0.10934
485077	Dihydrochelerythrine	Leukocyte common antigen	PTPRC	P08575	0.10934
485077	Dihydrochelerythrine	Tyrosine-protein kinase SYK	SYK	P43405	0.10934
485077	Dihydrochelerythrine	Acetylcholinesterase	ACHE	P22303	0.10934
485077	Dihydrochelerythrine	Transient receptor potential cation channel subfamily M member 8 (by homology)	TRPM8	Q7Z2W7	0.10934
485077	Dihydrochelerythrine	PI4-kinase beta subunit	PI4KB	Q9UBF8	0.10934
485077	Dihydrochelerythrine	PI4-kinase alpha subunit	PI4KA	P42356	0.10934
485077	Dihydrochelerythrine	PI3-kinase p110-alpha subunit	PIK3CA	P42336	0.10934
485077	Dihydrochelerythrine	5-lipoxygenase activating protein	ALOX5AP	P20292	0.10934
485077	Dihydrochelerythrine	Histone deacetylase 6	HDAC6	Q9UBN7	0.10934
485077	Dihydrochelerythrine	Cytochrome P450 19A1	CYP19A1	P11511	0.10934
485077	Dihydrochelerythrine	Dihydrofolate reductase	DHFR	P00374	0.10934
485077	Dihydrochelerythrine	Vascular endothelial growth factor receptor 1	FLT1	P17948	0.10934
485077	Dihydrochelerythrine	Cyclin-dependent kinase 4	CDK4	P11802	0.10934
485077	Dihydrochelerythrine	G1/S-specific cyclin-D1	CCND1	P24385	0.10934
485077	Dihydrochelerythrine	Cyclin-dependent kinase 2	CDK2	P24941	0.10934
485077	Dihydrochelerythrine	G1/S-specific cyclin-E1	CCNE1	P24864	0.10934
485077	Dihydrochelerythrine	G1/S-specific cyclin-E2	CCNE2	O96020	0.10934
485077	Dihydrochelerythrine	Carbonic anhydrase XII	CA12	O43570	0.10934
485077	Dihydrochelerythrine	Eukaryotic translation initiation factor 2-alpha kinase 3	EIF2AK3	Q9NZJ5	0.10934
485077	Dihydrochelerythrine	Prostaglandin E synthase	PTGES	O14684	0.10934
485077	Dihydrochelerythrine	Cytochrome P450 11B1	CYP11B1	P15538	0.10934
485077	Dihydrochelerythrine	Stem cell growth factor receptor	KIT	P10721	0.10934
485077	Dihydrochelerythrine	Alpha-synuclein	SNCA	P37840	0.10934
485077	Dihydrochelerythrine	Tubulin beta-3 chain	TUBB3	Q13509	0.10934
485077	Dihydrochelerythrine	Phosphodiesterase 10A	PDE10A	Q9Y233	0.10934
485077	Dihydrochelerythrine	Glutaminyl-peptide cyclotransferase	QPCT	Q16769	0.10934
485077	Dihydrochelerythrine	Nerve growth factor receptor Trk-A	NTRK1	P04629	0.10934
485077	Dihydrochelerythrine	Macrophage colony stimulating factor receptor	CSF1R	P07333	0.10934
485077	Dihydrochelerythrine	Tubulin beta-1 chain	TUBB1	Q9H4B7	0.10934
485077	Dihydrochelerythrine	MAP kinase p38 alpha	MAPK14	Q16539	0.10934
485077	Dihydrochelerythrine	Dual specificity protein kinase CLK3	CLK3	P49761	0.10934
485077	Dihydrochelerythrine	Group X secretory phospholipase A2	PLA2G10	O15496	0.10934
485077	Dihydrochelerythrine	Serine/threonine-protein kinase Chk1	CHEK1	O14757	0.10934
485077	Dihydrochelerythrine	Monoamine oxidase A	MAOA	P21397	0.10934
485077	Dihydrochelerythrine	TGF-beta receptor type I	TGFBR1	P36897	0.10934
485077	Dihydrochelerythrine	Adenosine A1 receptor	ADORA1	P30542	0.10934
485077	Dihydrochelerythrine	Adenosine A2a receptor	ADORA2A	P29274	0.10934
485077	Dihydrochelerythrine	Endothelin receptor ET-A	EDNRA	P25101	0.10934
485077	Dihydrochelerythrine	PI3-kinase p110-gamma subunit	PIK3CG	P48736	0.10934
485077	Dihydrochelerythrine	Lymphocyte differentiation antigen CD38	CD38	P28907	0.10934
485077	Dihydrochelerythrine	Indoleamine 2,3-dioxygenase	IDO1	P14902	0.10934
485077	Dihydrochelerythrine	Ribosomal protein S6 kinase alpha 3	RPS6KA3	P51812	0.10934
485077	Dihydrochelerythrine	Adenosine A3 receptor	ADORA3	P0DMS8	0.10934
485077	Dihydrochelerythrine	Perforin-1	PRF1	P14222	0.10934
485077	Dihydrochelerythrine	Carbonic anhydrase VII	CA7	P43166	0.10934
485077	Dihydrochelerythrine	Caspase-3	CASP3	P42574	0.10934
485077	Dihydrochelerythrine	Phosphodiesterase 4A	PDE4A	P27815	0.10934
485077	Dihydrochelerythrine	Carbonic anhydrase XIV	CA14	Q9ULX7	0.10934
485077	Dihydrochelerythrine	Acyl-CoA desaturase	SCD	O00767	0.10934
485077	Dihydrochelerythrine	Cyclooxygenase-2	PTGS2	P35354	0.10934
485077	Dihydrochelerythrine	c-Jun N-terminal kinase 3	MAPK10	P53779	0.10934
485077	Dihydrochelerythrine	Nicotinamide phosphoribosyltransferase	NAMPT	P43490	0.10934
485077	Dihydrochelerythrine	Thromboxane-A synthase	TBXAS1	P24557	0.10934
485077	Dihydrochelerythrine	Anandamide amidohydrolase	FAAH	O00519	0.10934
485077	Dihydrochelerythrine	Tyrosine-protein kinase LCK	LCK	P06239	0.10934
485077	Dihydrochelerythrine	Cytochrome P450 11B2	CYP11B2	P19099	0.10934
485077	Dihydrochelerythrine	Methionyl-tRNA synthetase	MARS	P56192	0.10934
485077	Dihydrochelerythrine	Phosphoglycerate kinase 1	PGK1	P00558	0.10934
485077	Dihydrochelerythrine	Serine/threonine-protein kinase NEK2	NEK2	P51955	0.10934
485077	Dihydrochelerythrine	11-beta-hydroxysteroid dehydrogenase 1	HSD11B1	P28845	0.10934
485077	Dihydrochelerythrine	Inosine-5'-monophosphate dehydrogenase 2	IMPDH2	P12268	0.10934
485077	Dihydrochelerythrine	Serine/threonine-protein kinase Aurora-B	AURKB	Q96GD4	0.10934
485077	Dihydrochelerythrine	Serine/threonine-protein kinase AKT2	AKT2	P31751	0.10934
485077	Dihydrochelerythrine	3-phosphoinositide dependent protein kinase-1	PDPK1	O15530	0.10934
485077	Dihydrochelerythrine	Serine/threonine-protein kinase AKT	AKT1	P31749	0.10934
485077	Dihydrochelerythrine	Mineralocorticoid receptor	NR3C2	P08235	0.10934
485077	Dihydrochelerythrine	Progesterone receptor	PGR	P06401	0.10934
485077	Dihydrochelerythrine	MAP kinase-activated protein kinase 2	MAPKAPK2	P49137	0.10934
485077	Dihydrochelerythrine	Metabotropic glutamate receptor 5	GRM5	P41594	0.10934
485077	Dihydrochelerythrine	Metabotropic glutamate receptor 1	GRM1	Q13255	0.10934
485077	Dihydrochelerythrine	Induced myeloid leukemia cell differentiation protein Mcl-1	MCL1	Q07820	0.10934
485077	Dihydrochelerythrine	Monoamine oxidase B	MAOB	P27338	0.10934
485077	Dihydrochelerythrine	CDC7/DBF4 (Cell division cycle 7-related protein kinase/Activator of S phase kinase)	CDC7	O00311	0.10934
485077	Dihydrochelerythrine	Cytochrome P450 17A1	CYP17A1	P05093	0.10934
485077	Dihydrochelerythrine	Adenosine kinase	ADK	P55263	0.10934
485077	Dihydrochelerythrine	GABA receptor alpha-1 subunit (by homology)	GABRA1	P14867	0.10934
485077	Dihydrochelerythrine	c-Jun N-terminal kinase 1	MAPK8	P45983	0.10934
485077	Dihydrochelerythrine	Estrogen receptor beta	ESR2	Q92731	0.10934
485077	Dihydrochelerythrine	Glycogen synthase kinase-3 beta	GSK3B	P49841	0.10934
485077	Dihydrochelerythrine	Cyclin-dependent kinase 2	CDK2	P24941	0.10934
485077	Dihydrochelerythrine	Cyclin-dependent kinase 1	CDK1	P06493	0.10934
485077	Dihydrochelerythrine	PI3-kinase p110-delta subunit	PIK3CD	O00329	0.10934
485077	Dihydrochelerythrine	PI3-kinase p110-beta subunit	PIK3CB	P42338	0.10934
485077	Dihydrochelerythrine	Nuclear receptor ROR-gamma	RORC	P51449	0.10934
485077	Dihydrochelerythrine	Rho-associated protein kinase 1	ROCK1	Q13464	0.10934
485077	Dihydrochelerythrine	Bromodomain-containing protein 4	BRD4	O60885	0.10934
485077	Dihydrochelerythrine	Microtubule-associated protein tau	MAPT	P10636	0.10934
485077	Dihydrochelerythrine	15-hydroxyprostaglandin dehydrogenase [NAD+]	HPGD	P15428	0.10934
485077	Dihydrochelerythrine	Bromodomain-containing protein 2	BRD2	P25440	0.10934
485077	Dihydrochelerythrine	Bromodomain-containing protein 3	BRD3	Q15059	0.10934
485077	Dihydrochelerythrine	Caspase-9	CASP9	P55211	0.10934
485077	Dihydrochelerythrine	Beta amyloid A4 protein	APP	P05067	0.10934
485077	Dihydrochelerythrine	Cholecystokinin B receptor (by homology)	CCKBR	P32239	0.10934
485077	Dihydrochelerythrine	Caspase-6	CASP6	P55212	0.10934
485077	Dihydrochelerythrine	Caspase-7	CASP7	P55210	0.10934
485077	Dihydrochelerythrine	Protein kinase C epsilon	PRKCE	Q02156	0.10934
485077	Dihydrochelerythrine	Vanilloid receptor	TRPV1	Q8NER1	0.10934
5742590	Sitogluside	Interleukin-2	IL2	P60568	0.439828
5742590	Sitogluside	Signal transducer and activator of transcription 3	STAT3	P40763	0.181153
5320083	Glycyrol	Phosphodiesterase 4D	PDE4D	Q08499	0.129284
5320083	Glycyrol	Arachidonate 15-lipoxygenase	ALOX15	P16050	0.113286
5320083	Glycyrol	Exportin-1	XPO1	O14980	0.113286
5320083	Glycyrol	C-C chemokine receptor type 4	CCR4	P51679	0.113286
5320083	Glycyrol	Carbonic anhydrase XIII	CA13	Q8N1Q1	0.113286
5320083	Glycyrol	Endoplasmin	HSP90B1	P14625	0.113286
5320083	Glycyrol	Steroid 5-alpha-reductase 1	SRD5A1	P18405	0.113286
5320083	Glycyrol	Nuclear factor NF-kappa-B p105 subunit	NFKB1	P19838	0.113286
5320083	Glycyrol	Protein farnesyltransferase subunit beta	FNTB	P49356	0.113286
5320083	Glycyrol	Protein farnesyltransferase/geranylgeranyltransferase type-1 subunit alpha	FNTA	P49354	0.113286
5320083	Glycyrol	Heat shock protein HSP 90-beta	HSP90AB1	P08238	0.113286
5320083	Glycyrol	Heat shock protein HSP 90-alpha	HSP90AA1	P07900	0.113286
5320083	Glycyrol	G-protein coupled receptor 84	GPR84	Q9NQS5	0.113286
5320083	Glycyrol	Cystic fibrosis transmembrane conductance regulator	CFTR	P13569	0.113286
5320083	Glycyrol	Nitric oxide synthase, inducible (by homology)	NOS2	P35228	0.113286
5320083	Glycyrol	Estrogen receptor beta	ESR2	Q92731	0.113286
5320083	Glycyrol	Arachidonate 12-lipoxygenase	ALOX12	P18054	0.113286
5320083	Glycyrol	Histone acetyltransferase p300	EP300	Q09472	0.113286
5320083	Glycyrol	Mannose-6-phosphate isomerase	MPI	P34949	0.113286
5320083	Glycyrol	Egl nine homolog 1	EGLN1	Q9GZT9	0.113286
72281	Hesperetin	Carbonic anhydrase VII	CA7	P43166	1
72281	Hesperetin	Carbonic anhydrase XII	CA12	O43570	1
72281	Hesperetin	Carbonic anhydrase IV	CA4	P22748	1
72281	Hesperetin	Cytochrome P450 1B1	CYP1B1	Q16678	1
72281	Hesperetin	Cytochrome P450 19A1	CYP19A1	P11511	0.206265
72281	Hesperetin	Taste receptor type 2 member 31	TAS2R31	P59538	0.166799
72281	Hesperetin	Adenosine A1 receptor (by homology)	ADORA1	P30542	0.166799
72281	Hesperetin	Adenosine A3 receptor	ADORA3	P0DMS8	0.166799
72281	Hesperetin	ATP-binding cassette sub-family G member 2	ABCG2	Q9UNQ0	0.158886
72281	Hesperetin	Estradiol 17-beta-dehydrogenase 1	HSD17B1	P14061	0.158886
72281	Hesperetin	Estrogen receptor beta	ESR2	Q92731	0.150982
72281	Hesperetin	Estrogen receptor alpha	ESR1	P03372	0.135202
72281	Hesperetin	Monoamine oxidase B	MAOB	P27338	0.135202
72281	Hesperetin	Multidrug resistance-associated protein 1	ABCC1	P33527	0.127303
72281	Hesperetin	Testis-specific androgen-binding protein	SHBG	P04278	0.127303
72281	Hesperetin	Carbonyl reductase [NADPH] 1	CBR1	P16152	0.127303
72281	Hesperetin	Matrix metalloproteinase 13	MMP13	P45452	0.127303
72281	Hesperetin	Cyclooxygenase-1	PTGS1	P23219	0.119404
72281	Hesperetin	Beta-secretase 1	BACE1	P56817	0.111502
72281	Hesperetin	Matrix metalloproteinase 12	MMP12	P39900	0.111502
72281	Hesperetin	Metabotropic glutamate receptor 5	GRM5	P41594	0.111502
72281	Hesperetin	Tyrosine-protein kinase SRC	SRC	P12931	0.111502
72281	Hesperetin	Aldo-keto-reductase family 1 member C3	AKR1C3	P42330	0.111502
72281	Hesperetin	Phospholipase A2 group 1B	PLA2G1B	P04054	0.111502
72281	Hesperetin	Kallikrein 1	KLK1	P06870	0.111502
72281	Hesperetin	Kallikrein 2	KLK2	P20151	0.111502
72281	Hesperetin	Carbonic anhydrase III	CA3	P07451	0.111502
72281	Hesperetin	Neuronal acetylcholine receptor protein alpha-7 subunit	CHRNA7	P36544	0.111502
72281	Hesperetin	Telomerase reverse transcriptase	TERT	O14746	0.111502
72281	Hesperetin	Carbonic anhydrase II	CA2	P00918	0.111502
72281	Hesperetin	Carbonic anhydrase I	CA1	P00915	0.111502
72281	Hesperetin	Carbonic anhydrase VI	CA6	P23280	0.111502
72281	Hesperetin	Carbonic anhydrase VA	CA5A	P35218	0.111502
72281	Hesperetin	DNA polymerase beta (by homology)	POLB	P06746	0.111502
72281	Hesperetin	Plasminogen activator inhibitor-1	SERPINE1	P05121	0.111502
72281	Hesperetin	Beta amyloid A4 protein	APP	P05067	0.111502
72281	Hesperetin	Phospholipase A2 group V	PLA2G5	P39877	0.111502
72281	Hesperetin	Group X secretory phospholipase A2	PLA2G10	O15496	0.111502
72281	Hesperetin	Plasminogen	PLG	P00747	0.111502
72281	Hesperetin	NADPH oxidase 4	NOX4	Q9NPH5	0.111502
72281	Hesperetin	Carbonic anhydrase XIII	CA13	Q8N1Q1	0.111502
72281	Hesperetin	Carbonic anhydrase VB	CA5B	Q9Y2D0	0.111502
72281	Hesperetin	Acetylcholinesterase	ACHE	P22303	0.111502
72281	Hesperetin	Beta-glucuronidase	GUSB	P08236	0.111502
72281	Hesperetin	Acyl coenzyme A:cholesterol acyltransferase	CES1	P23141	0.111502
72281	Hesperetin	Sodium/glucose cotransporter 2	SLC5A2	P31639	0.111502
72281	Hesperetin	Carboxylesterase 2	CES2	O00748	0.111502
72281	Hesperetin	Retinoid X receptor alpha	RXRA	P19793	0.111502
72281	Hesperetin	Vascular endothelial growth factor receptor 2	KDR	P35968	0.111502
72281	Hesperetin	Metabotropic glutamate receptor 2 (by homology)	GRM2	Q14416	0.111502
72281	Hesperetin	Aldose reductase	AKR1B1	P15121	0.111502
72281	Hesperetin	Cyclin-dependent kinase 1	CDK1	P06493	0.111502
72281	Hesperetin	G2/mitotic-specific cyclin-B1	CCNB1	P14635	0.111502
72281	Hesperetin	G1/S-specific cyclin-E1	CCNE1	P24864	0.111502
72281	Hesperetin	Cyclin-dependent kinase 2	CDK2	P24941	0.111502
72281	Hesperetin	Dual specificity protein phosphatase 3	DUSP3	P51452	0.111502
72281	Hesperetin	Nerve growth factor receptor Trk-A	NTRK1	P04629	0.111502
72281	Hesperetin	Serine/threonine-protein kinase Aurora-A	AURKA	O14965	0.111502
72281	Hesperetin	Carbonic anhydrase IX	CA9	Q16790	0.111502
72281	Hesperetin	DNA topoisomerase I	TOP1	P11387	0.111502
72281	Hesperetin	DNA (cytosine-5)-methyltransferase 1	DNMT1	P26358	0.111502
72281	Hesperetin	6-phosphogluconate dehydrogenase	PGD	P52209	0.111502
72281	Hesperetin	CMP-N-acetylneuraminate-beta-1,4-galactoside alpha-2,3-sialyltransferase	ST3GAL3	Q11203	0.111502
72281	Hesperetin	Alpha-(1,3)-fucosyltransferase 7	FUT7	Q11130	0.111502
72281	Hesperetin	Fucosyltransferase 4	FUT4	P22083	0.111502
72281	Hesperetin	Signal transducer and activator of transcription 1-alpha/beta	STAT1	P42224	0.111502
72281	Hesperetin	Squalene monooxygenase (by homology)	SQLE	Q14534	0.111502
72281	Hesperetin	Free fatty acid receptor 1	FFAR1	O14842	0.111502
72281	Hesperetin	Serine/threonine-protein kinase PIM1	PIM1	P11309	0.111502
72281	Hesperetin	Serine/threonine-protein kinase PIM2	PIM2	Q9P1W9	0.111502
72281	Hesperetin	Serine/threonine-protein kinase PIM3	PIM3	Q86V86	0.111502
72281	Hesperetin	Matrix metalloproteinase 2	MMP2	P08253	0.111502
72281	Hesperetin	Insulin-like growth factor I receptor	IGF1R	P08069	0.111502
72281	Hesperetin	Matrix metalloproteinase 9	MMP9	P14780	0.111502
72281	Hesperetin	Ornithine decarboxylase	ODC1	P11926	0.111502
72281	Hesperetin	Poly [ADP-ribose] polymerase-1	PARP1	P09874	0.111502
72281	Hesperetin	Dynamin-1	DNM1	Q05193	0.111502
72281	Hesperetin	Tankyrase-2	TNKS2	Q9H2K2	0.111502
72281	Hesperetin	Tankyrase-1	TNKS	O95271	0.111502
72281	Hesperetin	Hepatocyte growth factor receptor	MET	P08581	0.111502
72281	Hesperetin	Dual-specificity tyrosine-phosphorylation regulated kinase 1A	DYRK1A	Q13627	0.111502
72281	Hesperetin	P-glycoprotein 1	ABCB1	P08183	0.111502
72281	Hesperetin	Peroxisome proliferator-activated receptor gamma	PPARG	P37231	0.111502
72281	Hesperetin	Mitogen-activated protein kinase kinase kinase kinase 4	MAP4K4	O95819	0.111502
72281	Hesperetin	Phospholipase A2 group IIA	PLA2G2A	P14555	0.111502
72281	Hesperetin	Cyclin-dependent kinase 2	CDK2	P24941	0.111502
72281	Hesperetin	Cyclin-A1	CCNA1	P78396	0.111502
72281	Hesperetin	Cyclin-A2	CCNA2	P20248	0.111502
72281	Hesperetin	Protein-arginine N-methyltransferase 1	PRMT1	Q99873	0.111502
72281	Hesperetin	Estradiol 17-beta-dehydrogenase 2	HSD17B2	P37059	0.111502
72281	Hesperetin	Endothelin receptor ET-A	EDNRA	P25101	0.111502
72281	Hesperetin	Apoptosis regulator Bcl-2	BCL2	P10415	0.111502
5408233	Salutaridine	Protein arginine N-methyltransferase 6	PRMT6	Q96LA8	0.104672
5408233	Salutaridine	Protein arginine N-methyltransferase 8	PRMT8	Q9NR22	0.104672
5408233	Salutaridine	Protein-arginine N-methyltransferase 1	PRMT1	Q99873	0.104672
5408233	Salutaridine	Mu opioid receptor	OPRM1	P35372	0.104672
5408233	Salutaridine	Nitric oxide synthase, inducible	NOS2	P35228	0.104672
5408233	Salutaridine	Cyclin-dependent kinase 2	CDK2	P24941	0.104672
5408233	Salutaridine	G1/S-specific cyclin-E1	CCNE1	P24864	0.104672
5408233	Salutaridine	Myeloperoxidase	MPO	P05164	0.104672
5408233	Salutaridine	Bradykinin B2 receptor	BDKRB2	P30411	0.104672
5408233	Salutaridine	Protein kinase C theta	PRKCQ	Q04759	0.104672
5408233	Salutaridine	Serotonin 2b (5-HT2b) receptor	HTR2B	P41595	0.104672
5408233	Salutaridine	Serotonin 2c (5-HT2c) receptor	HTR2C	P28335	0.104672
5408233	Salutaridine	Delta opioid receptor (by homology)	OPRD1	P41143	0.104672
5408233	Salutaridine	Serotonin 3a (5-HT3a) receptor	HTR3A	P46098	0.104672
5408233	Salutaridine	Norepinephrine transporter	SLC6A2	P23975	0.104672
5408233	Salutaridine	Protein kinase C delta	PRKCD	Q05655	0.104672
5408233	Salutaridine	Protein kinase C alpha	PRKCA	P17252	0.104672
5408233	Salutaridine	Casein kinase II alpha	CSNK2A1	P68400	0.104672
5408233	Salutaridine	Casein kinase II alpha (prime)	CSNK2A2	P19784	0.104672
5408233	Salutaridine	Peptide N-myristoyltransferase 1	NMT1	P30419	0.104672
5408233	Salutaridine	PDZ-binding kinase	PBK	Q96KB5	0.104672
5408233	Salutaridine	Dopamine D5 receptor	DRD5	P21918	0.104672
5408233	Salutaridine	HERG	KCNH2	Q12809	0.104672
5408233	Salutaridine	Kappa Opioid receptor	OPRK1	P41145	0.104672
5408233	Salutaridine	Dipeptidyl peptidase II	DPP7	Q9UHL4	0.104672
5408233	Salutaridine	Maternal embryonic leucine zipper kinase	MELK	Q14680	0.104672
5408233	Salutaridine	Fibroblast activation protein alpha	FAP	Q12884	0.104672
5408233	Salutaridine	Dipeptidyl peptidase IX	DPP9	Q86TI2	0.104672
5408233	Salutaridine	Histamine H4 receptor	HRH4	Q9H3N8	0.104672
5408233	Salutaridine	Leukotriene A4 hydrolase	LTA4H	P09960	0.104672
5408233	Salutaridine	Serotonin 1f (5-HT1f) receptor	HTR1F	P30939	0.104672
5408233	Salutaridine	Serotonin 1d (5-HT1d) receptor	HTR1D	P28221	0.104672
5408233	Salutaridine	Serotonin 7 (5-HT7) receptor	HTR7	P34969	0.104672
5408233	Salutaridine	Serotonin 6 (5-HT6) receptor	HTR6	P50406	0.104672
5408233	Salutaridine	Phosphodiesterase 10A	PDE10A	Q9Y233	0.104672
5408233	Salutaridine	Melatonin receptor 1A	MTNR1A	P48039	0.104672
5408233	Salutaridine	Melatonin receptor 1B	MTNR1B	P49286	0.104672
5408233	Salutaridine	Histamine H3 receptor	HRH3	Q9Y5N1	0.104672
5408233	Salutaridine	Protein kinase C epsilon	PRKCE	Q02156	0.104672
5408233	Salutaridine	Protein kinase C eta	PRKCH	P24723	0.104672
5408233	Salutaridine	Macrophage colony stimulating factor receptor	CSF1R	P07333	0.104672
5408233	Salutaridine	Somatostatin receptor 5	SSTR5	P35346	0.104672
5408233	Salutaridine	Monoamine oxidase A	MAOA	P21397	0.104672
5408233	Salutaridine	Serine/threonine-protein kinase Chk1	CHEK1	O14757	0.104672
5408233	Salutaridine	Somatostatin receptor 4	SSTR4	P31391	0.104672
5408233	Salutaridine	Somatostatin receptor 1	SSTR1	P30872	0.104672
5408233	Salutaridine	Monoamine oxidase B	MAOB	P27338	0.104672
5408233	Salutaridine	Rho-associated protein kinase 2	ROCK2	O75116	0.104672
5408233	Salutaridine	Rho-associated protein kinase 1	ROCK1	Q13464	0.104672
5408233	Salutaridine	Dipeptidyl peptidase VIII	DPP8	Q6V1X1	0.104672
5408233	Salutaridine	c-Jun N-terminal kinase 1	MAPK8	P45983	0.104672
5408233	Salutaridine	Melanin-concentrating hormone receptor 1	MCHR1	Q99705	0.104672
5408233	Salutaridine	Muscarinic acetylcholine receptor M4	CHRM4	P08173	0.104672
5408233	Salutaridine	Muscarinic acetylcholine receptor M5 (by homology)	CHRM5	P08912	0.104672
5408233	Salutaridine	Muscarinic acetylcholine receptor M3	CHRM3	P20309	0.104672
5408233	Salutaridine	Carbonic anhydrase II	CA2	P00918	0.104672
5408233	Salutaridine	Carbonic anhydrase I	CA1	P00915	0.104672
5408233	Salutaridine	Tyrosine-protein kinase JAK1	JAK1	P23458	0.104672
5408233	Salutaridine	Carbonic anhydrase IX	CA9	Q16790	0.104672
5408233	Salutaridine	Tyrosine-protein kinase JAK3	JAK3	P52333	0.104672
5408233	Salutaridine	Alpha-1d adrenergic receptor	ADRA1D	P25100	0.104672
5408233	Salutaridine	Neurokinin 1 receptor (by homology)	TACR1	P25103	0.104672
5408233	Salutaridine	Tyrosine-protein kinase JAK2	JAK2	O60674	0.104672
5408233	Salutaridine	Tyrosine-protein kinase TYK2	TYK2	P29597	0.104672
5408233	Salutaridine	Retinoid X receptor alpha	RXRA	P19793	0.104672
5408233	Salutaridine	Histamine H1 receptor	HRH1	P35367	0.104672
5408233	Salutaridine	Nitric-oxide synthase, brain	NOS1	P29475	0.104672
5408233	Salutaridine	Adenosine A3 receptor	ADORA3	P0DMS8	0.104672
5408233	Salutaridine	Cytochrome P450 2D6	CYP2D6	P10635	0.104672
5408233	Salutaridine	Melanocortin receptor 4	MC4R	P32245	0.104672
5408233	Salutaridine	Glycogen synthase kinase-3 beta	GSK3B	P49841	0.104672
5408233	Salutaridine	Quinone reductase 2	NQO2	P16083	0.104672
5408233	Salutaridine	Lysine-specific histone demethylase 1	KDM1A	O60341	0.104672
5408233	Salutaridine	Hepatocyte growth factor receptor	MET	P08581	0.104672
5408233	Salutaridine	Inhibitor of apoptosis protein 3	XIAP	P98170	0.104672
5408233	Salutaridine	Baculoviral IAP repeat-containing protein 2	BIRC2	Q13490	0.104672
5408233	Salutaridine	Histamine H2 receptor	HRH2	P25021	0.104672
5408233	Salutaridine	Rho-associated protein kinase 1	ROCK1	Q13464	0.104672
5408233	Salutaridine	Rho-associated protein kinase 2	ROCK2	O75116	0.104672
5408233	Salutaridine	Quinone reductase 1	NQO1	P15559	0.104672
10177	indirubin	Tyrosine-protein kinase receptor FLT3	FLT3	P36888	0.69844
10177	indirubin	Cyclin-dependent kinase 5	CDK5	Q00535	0.665851
10177	indirubin	Cyclin-dependent kinase 5 activator 1	CDK5R1	Q15078	0.665851
10177	indirubin	Cyclin-dependent kinase 1	CDK1	P06493	0.5429
10177	indirubin	G2/mitotic-specific cyclin-B1	CCNB1	P14635	0.5429
10177	indirubin	G2/mitotic-specific cyclin-B2	CCNB2	O95067	0.5429
10177	indirubin	G2/mitotic-specific cyclin-B3	CCNB3	Q8WWL7	0.5429
10177	indirubin	Cyclin-dependent kinase 2	CDK2	P24941	0.116965
10177	indirubin	Cyclin-dependent kinase 1	CDK1	P06493	0.116965
10177	indirubin	Cyclin-dependent kinase 4	CDK4	P11802	0.108771
10177	indirubin	Serine/threonine-protein kinase Aurora-B	AURKB	Q96GD4	0.100579
10177	indirubin	Serine/threonine-protein kinase Aurora-C	AURKC	Q9UQB9	0.100579
10177	indirubin	Serine/threonine-protein kinase Aurora-A	AURKA	O14965	0.100579
10177	indirubin	Calcium-activated potassium channel subunit alpha-1	KCNMA1	Q12791	0.100579
10177	indirubin	Carbonic anhydrase II	CA2	P00918	0.100579
10177	indirubin	Carbonic anhydrase I	CA1	P00915	0.100579
10177	indirubin	Carbonic anhydrase XII	CA12	O43570	0.100579
10177	indirubin	Carbonic anhydrase IX	CA9	Q16790	0.100579
10177	indirubin	Adenosine A1 receptor	ADORA1	P30542	0.100579
10177	indirubin	Adenosine A2a receptor	ADORA2A	P29274	0.100579
10177	indirubin	Quinone reductase 1	NQO1	P15559	0.100579
10177	indirubin	Quinone reductase 2	NQO2	P16083	0.100579
10177	indirubin	Arachidonate 5-lipoxygenase	ALOX5	P09917	0.100579
10177	indirubin	Serine/threonine-protein kinase PLK4	PLK4	O00444	0.100579
10177	indirubin	Vascular endothelial growth factor receptor 2	KDR	P35968	0.100579
10177	indirubin	Serine/threonine-protein kinase PIM1	PIM1	P11309	0.100579
10177	indirubin	Egl nine homolog 1	EGLN1	Q9GZT9	0.100579
10177	indirubin	Serine/threonine-protein kinase/endoribonuclease IRE1	ERN1	O75460	0.100579
10177	indirubin	Dual specificity phosphatase Cdc25B	CDC25B	P30305	0.100579
10177	indirubin	Fatty acid desaturase 1	FADS1	O60427	0.100579
10177	indirubin	Phosphodiesterase 5A	PDE5A	O76074	0.100579
10177	indirubin	Metabotropic glutamate receptor 5	GRM5	P41594	0.100579
10177	indirubin	Poly [ADP-ribose] polymerase 2	PARP2	Q9UGN5	0.100579
10177	indirubin	Tankyrase-2	TNKS2	Q9H2K2	0.100579
10177	indirubin	Tankyrase-1	TNKS	O95271	0.100579
10177	indirubin	NAD-dependent deacetylase sirtuin 1	SIRT1	Q96EB6	0.100579
10177	indirubin	Caspase-6	CASP6	P55212	0.100579
10177	indirubin	ATP-binding cassette sub-family G member 2	ABCG2	Q9UNQ0	0.100579
10177	indirubin	Gamma-aminobutyric acid receptor subunit alpha-1	GABRA1	P14867	0.100579
10177	indirubin	Gamma-aminobutyric acid receptor subunit beta-2	GABRB2	P47870	0.100579
10177	indirubin	Gamma-aminobutyric acid receptor subunit gamma-2	GABRG2	P18507	0.100579
10177	indirubin	Poly [ADP-ribose] polymerase-1	PARP1	P09874	0.100579
10177	indirubin	Interleukin-8 receptor B	CXCR2	P25025	0.100579
10177	indirubin	Cathepsin (V and K)	CTSV	O60911	0.100579
10177	indirubin	Cathepsin L	CTSL	P07711	0.100579
10177	indirubin	Serine/threonine-protein kinase 33	STK33	Q9BYT3	0.100579
10177	indirubin	Estradiol 17-beta-dehydrogenase 2	HSD17B2	P37059	0.100579
10177	indirubin	Troponin C, slow skeletal and cardiac muscles	TNNC1	P63316	0.100579
10177	indirubin	Troponin T, cardiac muscle	TNNT2	P45379	0.100579
10177	indirubin	Troponin I, cardiac muscle	TNNI3	P19429	0.100579
10177	indirubin	3-phosphoinositide dependent protein kinase-1	PDPK1	O15530	0.100579
10177	indirubin	Prostaglandin E synthase	PTGES	O14684	0.100579
10177	indirubin	LDL-associated phospholipase A2	PLA2G7	Q13093	0.100579
10177	indirubin	Alkaline phosphatase, tissue-nonspecific isozyme	ALPL	P05186	0.100579
10177	indirubin	c-Jun N-terminal kinase 3	MAPK10	P53779	0.100579
10177	indirubin	Chymase	CMA1	P23946	0.100579
10177	indirubin	Cathepsin G	CTSG	P08311	0.100579
10177	indirubin	Tyrosine-protein kinase JAK3	JAK3	P52333	0.100579
10177	indirubin	Tyrosine-protein kinase JAK2	JAK2	O60674	0.100579
10177	indirubin	p53-binding protein Mdm-2	MDM2	Q00987	0.100579
3035728	qingdainone	Phosphodiesterase 10A (by homology)	PDE10A	Q9Y233	0.115737
3035728	qingdainone	MAP kinase p38 alpha	MAPK14	Q16539	0.115737
3035728	qingdainone	Potassium channel, inwardly rectifying, subfamily J, member 11	KCNJ11	Q14654	0.115737
3035728	qingdainone	Carnitine O-palmitoyltransferase 1, liver isoform	CPT1A	P50416	0.115737
3035728	qingdainone	ATP-binding cassette sub-family G member 2	ABCG2	Q9UNQ0	0.115737
3035728	qingdainone	Serine/threonine-protein kinase PIM1	PIM1	P11309	0.115737
3035728	qingdainone	Serine/threonine-protein kinase PIM2	PIM2	Q9P1W9	0.115737
3035728	qingdainone	Tyrosine-protein kinase ABL	ABL1	P00519	0.115737
3035728	qingdainone	Cyclin-dependent kinase 4	CDK4	P11802	0.115737
3035728	qingdainone	G1/S-specific cyclin-D1	CCND1	P24385	0.115737
3035728	qingdainone	Cyclin-dependent kinase 2	CDK2	P24941	0.115737
3035728	qingdainone	G1/S-specific cyclin-E1	CCNE1	P24864	0.115737
3035728	qingdainone	G1/S-specific cyclin-E2	CCNE2	O96020	0.115737
3035728	qingdainone	P2X purinoceptor 3	P2RX3	P56373	0.115737
3035728	qingdainone	Potassium channel subfamily K member 3	KCNK3	O14649	0.115737
3035728	qingdainone	Potassium channel subfamily K member 9	KCNK9	Q9NPC2	0.115737
3035728	qingdainone	Dopamine D4 receptor	DRD4	P21917	0.115737
3035728	qingdainone	G protein-activated inward rectifier potassium channel 1	KCNJ3	P48549	0.115737
3035728	qingdainone	G protein-activated inward rectifier potassium channel 4	KCNJ5	P48544
3035728	qingdainone	G protein-activated inward rectifier potassium channel 2	KCNJ6	P48051	0.115737
3035728	qingdainone	Tyrosine-protein kinase JAK3	JAK3	P52333	0.115737
3035728	qingdainone	Tyrosine-protein kinase JAK2	JAK2	O60674	0.115737
3035728	qingdainone	Orexin receptor 2	HCRTR2	O43614	0.115737
3035728	qingdainone	Bcl2-antagonist of cell death (BAD)	BAD	Q92934	0.115737
3035728	qingdainone	Cathepsin (B and K)	CTSB	P07858	0.115737
3035728	qingdainone	Adenosine A1 receptor	ADORA1	P30542	0.115737
3035728	qingdainone	Adenosine A2a receptor	ADORA2A	P29274	0.115737
3035728	qingdainone	Adenosine A2b receptor	ADORA2B	P29275	0.115737
3035728	qingdainone	Metabotropic glutamate receptor 5	GRM5	P41594	0.115737
3035728	qingdainone	Caspase-3	CASP3	P42574	0.115737
3035728	qingdainone	Tyrosine-protein kinase SRC	SRC	P12931	0.115737
3035728	qingdainone	Cathepsin S	CTSS	P25774	0.115737
3035728	qingdainone	Cathepsin (V and K)	CTSV	O60911	0.115737
3035728	qingdainone	Caspase-7	CASP7	P55210	0.115737
3035728	qingdainone	Cathepsin L	CTSL	P07711	0.115737
3035728	qingdainone	Translocator protein (by homology)	TSPO	P30536	0.115737
3035728	qingdainone	Adenosine A3 receptor	ADORA3	P0DMS8	0.115737
3035728	qingdainone	Cathepsin K	CTSK	P43235	0.115737
3035728	qingdainone	Orexin receptor 1	HCRTR1	O43613	0.115737
3035728	qingdainone	Cyclin-dependent kinase 1	CDK1	P06493	0.115737
3035728	qingdainone	G2/mitotic-specific cyclin-B1	CCNB1	P14635	0.115737
3035728	qingdainone	G2/mitotic-specific cyclin-B2	CCNB2	O95067	0.115737
3035728	qingdainone	G2/mitotic-specific cyclin-B3	CCNB3	Q8WWL7	0.115737
3035728	qingdainone	Glycogen synthase kinase-3 beta	GSK3B	P49841	0.115737
3035728	qingdainone	Serotonin 1a (5-HT1a) receptor	HTR1A	P08908	0.115737
3035728	qingdainone	Dopamine D2 receptor	DRD2	P14416	0.115737
3035728	qingdainone	Serotonin 7 (5-HT7) receptor	HTR7	P34969	0.115737
3035728	qingdainone	Serotonin 6 (5-HT6) receptor	HTR6	P50406	0.115737
3035728	qingdainone	Gamma-aminobutyric acid receptor subunit beta-3	GABRB3	P28472	0.115737
3035728	qingdainone	Gamma-aminobutyric acid receptor subunit alpha-3	GABRA3	P34903	0.115737
3035728	qingdainone	Gamma-aminobutyric acid receptor subunit gamma-2	GABRG2	P18507	0.115737
3035728	qingdainone	Gamma-aminobutyric acid receptor subunit alpha-5	GABRA5	P31644	0.115737
3035728	qingdainone	Gamma-aminobutyric acid receptor subunit alpha-2	GABRA2	P47869	0.115737
3035728	qingdainone	Tyrosine-protein kinase SYK	SYK	P43405	0.115737
3035728	qingdainone	Hexokinase type IV	GCK	P35557	0.115737
3035728	qingdainone	Platelet-derived growth factor receptor beta	PDGFRB	P09619	0.115737
3035728	qingdainone	Cyclophilin A (by homology)	PPIA	P62937	0.115737
3035728	qingdainone	Muscarinic acetylcholine receptor M2 (by homology)	CHRM2	P08172	0.115737
3035728	qingdainone	Muscarinic acetylcholine receptor M1	CHRM1	P11229	0.115737
3035728	qingdainone	Cyclooxygenase-2	PTGS2	P35354	0.115737
3035728	qingdainone	Vascular endothelial growth factor receptor 2	KDR	P35968	0.115737
3035728	qingdainone	Fibroblast growth factor receptor 1	FGFR1	P11362	0.115737
3035728	qingdainone	Hepatocyte growth factor receptor	MET	P08581	0.115737
3035728	qingdainone	Bradykinin B1 receptor	BDKRB1	P46663	0.115737
3035728	qingdainone	Epidermal growth factor receptor erbB1	EGFR	P00533	0.115737
3035728	qingdainone	Leukocyte elastase	ELANE	P08246	0.115737
3035728	qingdainone	MAP kinase p38 beta	MAPK11	Q15759	0.115737
3035728	qingdainone	Macrophage colony stimulating factor receptor	CSF1R	P07333	0.115737
3035728	qingdainone	Cannabinoid receptor 1	CNR1	P21554	0.115737
3035728	qingdainone	Cannabinoid receptor 2	CNR2	P34972	0.115737
3035728	qingdainone	c-Jun N-terminal kinase 3	MAPK10	P53779	0.115737
3035728	qingdainone	Receptor protein-tyrosine kinase erbB-2	ERBB2	P04626	0.115737
3035728	qingdainone	Tyrosine-protein kinase receptor FLT3	FLT3	P36888	0.115737
3035728	qingdainone	PI3-kinase p110-alpha subunit	PIK3CA	P42336	0.115737
3035728	qingdainone	c-Jun N-terminal kinase 1	MAPK8	P45983	0.115737
3035728	qingdainone	Prostanoid EP3 receptor	PTGER3	P43115	0.115737
3035728	qingdainone	Metabotropic glutamate receptor 2	GRM2	Q14416	0.115737
3035728	qingdainone	Complement factor D	CFD	P00746	0.115737
3035728	qingdainone	Bromodomain-containing protein 4	BRD4	O60885	0.115737
3035728	qingdainone	Thrombin	F2	P00734	0.115737
3035728	qingdainone	SUMO-activating enzyme subunit 1	SAE1	Q9UBE0	0.115737
3035728	qingdainone	SUMO-activating enzyme subunit 2	UBA2	Q9UBT2	0.115737
3035728	qingdainone	Tyrosine-protein kinase LCK	LCK	P06239	0.115737
3035728	qingdainone	Casein kinase I delta	CSNK1D	P48730	0.115737
3035728	qingdainone	Serine/threonine-protein kinase 33	STK33	Q9BYT3	0.115737
3035728	qingdainone	Neprilysin (by homology)	MME	P08473	0.115737
3035728	qingdainone	Polyadenylate-binding protein 1	PABPC1	P11940	0.115737
3035728	qingdainone	Cyclin-dependent kinase 2	CDK2	P24941	0.115737
3035728	qingdainone	G1/S-specific cyclin-E1	CCNE1	P24864	0.115737
3035728	qingdainone	Mitogen-activated protein kinase kinase kinase 12	MAP3K12	Q12852	0.115737
3035728	qingdainone	Phosphodiesterase 4B	PDE4B	Q07343	0.115737
3035728	qingdainone	Cyclin-dependent kinase 2	CDK2	P24941	0.115737
3035728	qingdainone	DNA-dependent protein kinase	PRKDC	P78527	0.115737
3035728	qingdainone	Neurokinin 3 receptor	TACR3	P29371	0.115737
3035728	qingdainone	Transient receptor potential cation channel subfamily A member 1	TRPA1	O75762	0.115737
3035728	qingdainone	Prostanoid EP1 receptor	PTGER1	P34995	0.115737
3035728	qingdainone	Cytochrome P450 19A1	CYP19A1	P11511	0.115737
3035728	qingdainone	Inhibitor of nuclear factor kappa B kinase beta subunit	IKBKB	O14920	0.115737
3035728	qingdainone	Dopamine D3 receptor	DRD3	P35462	0.115737
3035728	qingdainone	Short transient receptor potential channel 6	TRPC6	Q9Y210	0.115737
3035728	qingdainone	Tyrosine-protein kinase JAK1	JAK1	P23458	0.115737
3035728	qingdainone	Matrix metalloproteinase 3	MMP3	P08254	0.115737
3035728	qingdainone	Matrix metalloproteinase 9	MMP9	P14780	0.115737
3035728	qingdainone	Tyrosine-protein kinase TYK2	TYK2	P29597	0.115737
3035728	qingdainone	TGF-beta receptor type I	TGFBR1	P36897	0.115737
3035728	qingdainone	Matrix metalloproteinase 8	MMP8	P22894	0.115737
3035728	qingdainone	Discoidin domain-containing receptor 2	DDR2	Q16832	0.115737
3035728	qingdainone	Neuronal acetylcholine receptor subunit alpha-4	CHRNA4	P43681	0.115737
3035728	qingdainone	Neuronal acetylcholine receptor subunit beta-2	CHRNB2	P17787	0.115737
3035728	qingdainone	Monoamine oxidase B	MAOB	P27338	0.115737
3035728	qingdainone	Beta-glucocerebrosidase	GBA	P04062	0.115737
3035728	qingdainone	Mannose-6-phosphate isomerase	MPI	P34949	0.115737
10215	indigo	Cyclin-dependent kinase 1	CDK1	P06493	0.125143
10215	indigo	G2/mitotic-specific cyclin-B1	CCNB1	P14635	0.125143
10215	indigo	G2/mitotic-specific cyclin-B2	CCNB2	O95067	0.125143
10215	indigo	G2/mitotic-specific cyclin-B3	CCNB3	Q8WWL7	0.125143
10215	indigo	Carbonic anhydrase II	CA2	P00918	0.100579
10215	indigo	Carbonic anhydrase XII	CA12	O43570	0.100579
10215	indigo	Carbonic anhydrase IX	CA9	Q16790	0.100579
10215	indigo	Methyl-CpG-binding protein 2	MECP2	P51608	0.100579
10215	indigo	Methyl-CpG-binding domain protein 2	MBD2	Q9UBB5	0.100579
10215	indigo	Cathepsin G	CTSG	P08311	0.100579
10215	indigo	Calcium-activated potassium channel subunit alpha-1	KCNMA1	Q12791	0.100579
10215	indigo	Vascular endothelial growth factor receptor 2	KDR	P35968	0.100579
10215	indigo	Cyclin-dependent kinase 5 activator 1	CDK5R1	Q15078	0.100579
10215	indigo	Cyclin-dependent kinase 5	CDK5	Q00535	0.100579
10215	indigo	Chymase	CMA1	P23946	0.100579
10215	indigo	Tyrosine-protein kinase receptor FLT3	FLT3	P36888	0.100579
98912	Quindoline	Gamma-aminobutyric acid receptor subunit beta-3	GABRB3	P28472	0.15708
98912	Quindoline	Gamma-aminobutyric acid receptor subunit alpha-3	GABRA3	P34903	0.15708
98912	Quindoline	Gamma-aminobutyric acid receptor subunit gamma-2	GABRG2	P18507	0.15708
98912	Quindoline	Gamma-aminobutyric acid receptor subunit alpha-5	GABRA5	P31644	0.15708
98912	Quindoline	Gamma-aminobutyric acid receptor subunit alpha-2	GABRA2	P47869	0.15708
98912	Quindoline	Quinone reductase 2	NQO2	P16083	0.103007
6096870	Indicaxanthin	Excitatory amino acid transporter 3	SLC1A1	P43005	0.111502
6096870	Indicaxanthin	Growth factor receptor-bound protein 2	GRB2	P62993	0.111502
6096870	Indicaxanthin	Angiotensin-converting enzyme	ACE	P12821	0.111502
6096870	Indicaxanthin	Aminopeptidase A	ENPEP	Q07075	0.111502
6096870	Indicaxanthin	Glutamate receptor ionotropic kainate 1	GRIK1	P39086	0.111502
6096870	Indicaxanthin	Gamma-glutamylcysteine synthetase	GCLC	P48506	0.111502
6096870	Indicaxanthin	Metabotropic glutamate receptor 3	GRM3	Q14832	0.111502
6096870	Indicaxanthin	Metabotropic glutamate receptor 2	GRM2	Q14416	0.111502
6096870	Indicaxanthin	Metabotropic glutamate receptor 8	GRM8	O00222	0.111502
6096870	Indicaxanthin	Glutamate receptor ionotropic kainate 2	GRIK2	Q13002	0.111502
6096870	Indicaxanthin	Metabotropic glutamate receptor 6	GRM6	O15303	0.111502
6096870	Indicaxanthin	Glutamate receptor ionotropic, AMPA 2	GRIA2	P42262	0.111502
6096870	Indicaxanthin	Betaine--homocysteine S-methyltransferase 1	BHMT	Q93088	0.111502
6096870	Indicaxanthin	Glutathione S-transferase kappa 1	GSTK1	Q9Y2Q3	0.111502
11973336	Paeoniflorgenin	Heat shock protein HSP 90-alpha	HSP90AA1	P07900	0.109946
11973336	Paeoniflorgenin	Galectin-3	LGALS3	P17931	0.101614
11973336	Paeoniflorgenin	Galectin-9	LGALS9	O00182	0.101614
11973336	Paeoniflorgenin	P-glycoprotein 1	ABCB1	P08183	0.101614
11973336	Paeoniflorgenin	Norepinephrine transporter	SLC6A2	P23975	0.101614
11973336	Paeoniflorgenin	Somatostatin receptor 5	SSTR5	P35346	0.101614
11973336	Paeoniflorgenin	Somatostatin receptor 2	SSTR2	P30874	0.101614
11973336	Paeoniflorgenin	Somatostatin receptor 4	SSTR4	P31391	0.101614
11973336	Paeoniflorgenin	Somatostatin receptor 1	SSTR1	P30872	0.101614
11973336	Paeoniflorgenin	Somatostatin receptor 3	SSTR3	P32745	0.101614
11973336	Paeoniflorgenin	Vascular endothelial growth factor A	VEGFA	P15692	0.101614
11973336	Paeoniflorgenin	Acidic fibroblast growth factor	FGF1	P05230	0.101614
11973336	Paeoniflorgenin	Basic fibroblast growth factor	FGF2	P09038	0.101614
11973336	Paeoniflorgenin	Heparanase	HPSE	Q9Y251	0.101614
11973336	Paeoniflorgenin	Platelet activating factor receptor (by homology)	PTAFR	P25105	0.101614
11973336	Paeoniflorgenin	Aldose reductase	AKR1B1	P15121	0.101614
100926405	6-Deglucosyl-3-O-methylpaeoniflorin	No valid target predicted	No valid target predicted	No valid target predicted	Not applicable
5320468	(2R,3R)-2-(3,5-dihydroxyphenyl)-3,5,7-trihydroxy-2,3-dihydrochromen-4-one	No valid target predicted	No valid target predicted	No valid target predicted	Not applicable
161409	Columbianetin acetate	All predicted targets Probability <0.1	All predicted targets Probability <0.1	All predicted targets Probability <0.1	Not applicable
9064	Cianidanol	No valid target predicted	No valid target predicted	No valid target predicted	Not applicable
107985	Triptolide	No valid target predicted	No valid target predicted	No valid target predicted	Not applicable
5280343	quercetin	NADPH oxidase 4	NOX4	Q9NPH5	1
5280343	quercetin	Vasopressin V2 receptor	AVPR2	P30518	1
5280343	quercetin	Aldose reductase	AKR1B1	P15121	1
5280343	quercetin	Xanthine dehydrogenase	XDH	P47989	1
5280343	quercetin	Monoamine oxidase A	MAOA	P21397	1
5280343	quercetin	Insulin-like growth factor I receptor	IGF1R	P08069	1
5280343	quercetin	Tyrosine-protein kinase receptor FLT3	FLT3	P36888	1
5280343	quercetin	Cytochrome P450 19A1	CYP19A1	P11511	1
5280343	quercetin	Epidermal growth factor receptor erbB1	EGFR	P00533	1
5280343	quercetin	Thrombin	F2	P00734	1
5280343	quercetin	Carbonic anhydrase II	CA2	P00918	1
5280343	quercetin	Serine/threonine-protein kinase PIM1	PIM1	P11309	1
5280343	quercetin	Arachidonate 5-lipoxygenase	ALOX5	P09917	1
5280343	quercetin	Serine/threonine-protein kinase Aurora-B	AURKB	Q96GD4	1
5280343	quercetin	Dopamine D4 receptor	DRD4	P21917	1
5280343	quercetin	Adenosine A1 receptor (by homology)	ADORA1	P30542	1
5280343	quercetin	Carbonic anhydrase VII	CA7	P43166	1
5280343	quercetin	Glyoxalase I	GLO1	Q04760	1
5280343	quercetin	Myeloperoxidase	MPO	P05164	1
5280343	quercetin	PI3-kinase p85-alpha subunit	PIK3R1	P27986	1
5280343	quercetin	Adenosine A2a receptor (by homology)	ADORA2A	P29274	1
5280343	quercetin	Death-associated protein kinase 1	DAPK1	P53355	1
5280343	quercetin	Liver glycogen phosphorylase	PYGL	P06737	1
5280343	quercetin	Carbonic anhydrase I	CA1	P00915	1
5280343	quercetin	Glycogen synthase kinase-3 beta	GSK3B	P49841	1
5280343	quercetin	Tyrosine-protein kinase SRC	SRC	P12931	1
5280343	quercetin	Focal adhesion kinase 1	PTK2	Q05397	1
5280343	quercetin	Estradiol 17-beta-dehydrogenase 2	HSD17B2	P37059	1
5280343	quercetin	Vascular endothelial growth factor receptor 2	KDR	P35968	1
5280343	quercetin	Matrix metalloproteinase 13	MMP13	P45452	1
5280343	quercetin	Matrix metalloproteinase 3	MMP3	P08254	1
5280343	quercetin	Carbonic anhydrase III	CA3	P07451	1
5280343	quercetin	Arachidonate 15-lipoxygenase	ALOX15	P16050	1
5280343	quercetin	Multidrug resistance-associated protein 1	ABCC1	P33527	1
5280343	quercetin	Serine/threonine-protein kinase PLK1	PLK1	P53350	1
5280343	quercetin	Carbonic anhydrase VI	CA6	P23280	1
5280343	quercetin	Cyclin-dependent kinase 1	CDK1	P06493	1
5280343	quercetin	Matrix metalloproteinase 9	MMP9	P14780	1
5280343	quercetin	Carbonic anhydrase XII	CA12	O43570	1
5280343	quercetin	Matrix metalloproteinase 2	MMP2	P08253	1
5280343	quercetin	Protein kinase N1	PKN1	Q16512	1
5280343	quercetin	Carbonic anhydrase XIV	CA14	Q9ULX7	1
5280343	quercetin	Carbonic anhydrase IX	CA9	Q16790	1
5280343	quercetin	Casein kinase II alpha	CSNK2A1	P68400	1
5280343	quercetin	Arachidonate 12-lipoxygenase	ALOX12	P18054	1
5280343	quercetin	Hepatocyte growth factor receptor	MET	P08581	1
5280343	quercetin	Carbonic anhydrase IV	CA4	P22748	1
5280343	quercetin	Serine/threonine-protein kinase NEK2	NEK2	P51955	1
5280343	quercetin	Interleukin-8 receptor A	CXCR1	P25024	1
5280343	quercetin	CaM kinase II beta	CAMK2B	Q13554	1
5280343	quercetin	ALK tyrosine kinase receptor	ALK	Q9UM73	1
5280343	quercetin	Serine/threonine-protein kinase AKT	AKT1	P31749	1
5280343	quercetin	P-glycoprotein 1	ABCB1	P08183	1
5280343	quercetin	Serine/threonine-protein kinase NEK6	NEK6	Q9HC98	1
5280343	quercetin	Phospholipase A2 group 1B	PLA2G1B	P04054	1
5280343	quercetin	Carbonic anhydrase VA	CA5A	P35218	1
5280343	quercetin	Beta-secretase 1	BACE1	P56817	1
5280343	quercetin	Cytochrome P450 1B1	CYP1B1	Q16678	1
5280343	quercetin	Tyrosine-protein kinase receptor UFO	AXL	P30530	1
5280343	quercetin	ATP-binding cassette sub-family G member 2	ABCG2	Q9UNQ0	1
5280343	quercetin	NUAK family SNF1-like kinase 1	NUAK1	O60285	1
5280343	quercetin	Aldo-keto reductase family 1 member C2 (by homology)	AKR1C2	P52895	1
5280343	quercetin	Aldo-keto reductase family 1 member C1 (by homology)	AKR1C1	Q04828	1
5280343	quercetin	Aldo-keto-reductase family 1 member C3 (by homology)	AKR1C3	P42330	1
5280343	quercetin	Aldo-keto reductase family 1 member C4 (by homology)	AKR1C4	P17516	1
5280343	quercetin	Carbonic anhydrase XIII (by homology)	CA13	Q8N1Q1	1
5280343	quercetin	Aldehyde reductase (by homology)	AKR1A1	P14550	1
5280343	quercetin	G-protein coupled receptor 35	GPR35	Q9HC97	1
5280343	quercetin	Tyrosine-protein kinase SYK	SYK	P43405	0.688122
5280343	quercetin	Microtubule-associated protein tau	MAPT	P10636	0.672321
5280343	quercetin	Lysine-specific demethylase 4D-like	KDM4E	B2RXH2	0.672321
5280343	quercetin	DNA topoisomerase II alpha	TOP2A	P11388	0.672321
5280343	quercetin	Insulin receptor	INSR	P06213	0.672321
5280343	quercetin	Acetylcholinesterase	ACHE	P22303	0.672321
5280343	quercetin	Myosin light chain kinase, smooth muscle	MYLK	Q15746	0.672321
5280343	quercetin	PI3-kinase p110-gamma subunit	PIK3CG	P48736	0.672321
5280343	quercetin	DNA-(apurinic or apyrimidinic site) lyase	APEX1	P27695	0.672321
5280343	quercetin	Receptor-type tyrosine-protein phosphatase S	PTPRS	Q13332	0.561771
5280343	quercetin	Estrogen receptor beta	ESR2	Q92731	0.561771
5280343	quercetin	DNA-3-methyladenine glycosylase	MPG	P29372	0.561771
5280343	quercetin	Solute carrier family 22 member 12	SLC22A12	Q96S37	0.561771
5280343	quercetin	Cyclin-dependent kinase 5 activator 1	CDK5R1	Q15078	0.553794
5280343	quercetin	Cyclin-dependent kinase 5	CDK5	Q00535	0.553794
5280343	quercetin	Cyclin-dependent kinase 1	CDK1	P06493	0.553794
5280343	quercetin	G2/mitotic-specific cyclin-B1	CCNB1	P14635	0.553794
5280343	quercetin	G2/mitotic-specific cyclin-B2	CCNB2	O95067	0.553794
5280343	quercetin	G2/mitotic-specific cyclin-B3	CCNB3	Q8WWL7	0.553794
5280343	quercetin	Arginase-1 (by homology)	ARG1	P05089	0.553794
5280343	quercetin	Cyclin-dependent kinase 6	CDK6	Q00534	0.514392
5280343	quercetin	Cyclin-dependent kinase 2	CDK2	P24941	0.514392
5280343	quercetin	Tyrosinase	TYR	P14679	0.411675
5280343	quercetin	Estradiol 17-beta-dehydrogenase 1	HSD17B1	P14061	0.411675
5280343	quercetin	Aryl hydrocarbon receptor	AHR	P35869	0.411675
5280343	quercetin	Estrogen-related receptor alpha	ESRRA	P11474	0.411675
5280343	quercetin	Beta amyloid A4 protein	APP	P05067	0.277371
5280343	quercetin	Poly [ADP-ribose] polymerase-1	PARP1	P09874	0.277371
5280343	quercetin	Transthyretin	TTR	P02766	0.277371
5280343	quercetin	Matrix metalloproteinase 12	MMP12	P39900	0.277371
5280343	quercetin	Lymphocyte differentiation antigen CD38	CD38	P28907	0.277371
5280343	quercetin	Aldo-keto reductase family 1 member B10	AKR1B10	O60218	0.277371
5280343	quercetin	Tankyrase-2	TNKS2	Q9H2K2	0.277371
5280343	quercetin	Tankyrase-1	TNKS	O95271	0.277371
5280343	quercetin	DNA topoisomerase I (by homology)	TOP1	P11387	0.277371
5280343	quercetin	Telomerase reverse transcriptase	TERT	O14746	0.206265
2177166	5-[5-(4-Methoxy-phenyl)-furan-2-ylmethylene]-pyrimidine-2,4,6-trione	Serine/threonine-protein kinase B-raf	BRAF	P15056	0.101614
2177166	5-[5-(4-Methoxy-phenyl)-furan-2-ylmethylene]-pyrimidine-2,4,6-trione	Caspase-3	CASP3	P42574	0.101614
2177166	5-[5-(4-Methoxy-phenyl)-furan-2-ylmethylene]-pyrimidine-2,4,6-trione	Fatty acid synthase	FASN	P49327	0.101614
2177166	5-[5-(4-Methoxy-phenyl)-furan-2-ylmethylene]-pyrimidine-2,4,6-trione	NAD-dependent protein deacylase sirtuin-5, mitochondrial	SIRT5	Q9NXA8	0.101614
2177166	5-[5-(4-Methoxy-phenyl)-furan-2-ylmethylene]-pyrimidine-2,4,6-trione	NAD-dependent deacetylase sirtuin 1	SIRT1	Q96EB6	0.101614
2177166	5-[5-(4-Methoxy-phenyl)-furan-2-ylmethylene]-pyrimidine-2,4,6-trione	Caspase-6	CASP6	P55212	0.101614
2177166	5-[5-(4-Methoxy-phenyl)-furan-2-ylmethylene]-pyrimidine-2,4,6-trione	Caspase-7	CASP7	P55210	0.101614
2177166	5-[5-(4-Methoxy-phenyl)-furan-2-ylmethylene]-pyrimidine-2,4,6-trione	Caspase-8	CASP8	Q14790	0.101614
2177166	5-[5-(4-Methoxy-phenyl)-furan-2-ylmethylene]-pyrimidine-2,4,6-trione	Caspase-2	CASP2	P42575	0.101614
2177166	5-[5-(4-Methoxy-phenyl)-furan-2-ylmethylene]-pyrimidine-2,4,6-trione	Adenosine A1 receptor (by homology)	ADORA1	P30542	0.101614
2177166	5-[5-(4-Methoxy-phenyl)-furan-2-ylmethylene]-pyrimidine-2,4,6-trione	Alkaline phosphatase, tissue-nonspecific isozyme	ALPL	P05186	0.101614
2177166	5-[5-(4-Methoxy-phenyl)-furan-2-ylmethylene]-pyrimidine-2,4,6-trione	Butyrylcholinesterase	BCHE	P06276	0.101614
2177166	5-[5-(4-Methoxy-phenyl)-furan-2-ylmethylene]-pyrimidine-2,4,6-trione	Matrix metalloproteinase 13	MMP13	P45452	0.101614
2177166	5-[5-(4-Methoxy-phenyl)-furan-2-ylmethylene]-pyrimidine-2,4,6-trione	Vanilloid receptor (by homology)	TRPV1	Q8NER1	0.101614
2177166	5-[5-(4-Methoxy-phenyl)-furan-2-ylmethylene]-pyrimidine-2,4,6-trione	Endothelin receptor ET-B	EDNRB	P24530	0.101614
2177166	5-[5-(4-Methoxy-phenyl)-furan-2-ylmethylene]-pyrimidine-2,4,6-trione	Endothelin receptor ET-A	EDNRA	P25101	0.101614
2177166	5-[5-(4-Methoxy-phenyl)-furan-2-ylmethylene]-pyrimidine-2,4,6-trione	Adenosine kinase	ADK	P55263	0.101614
2177166	5-[5-(4-Methoxy-phenyl)-furan-2-ylmethylene]-pyrimidine-2,4,6-trione	Adenosine A2a receptor (by homology)	ADORA2A	P29274	0.101614
2177166	5-[5-(4-Methoxy-phenyl)-furan-2-ylmethylene]-pyrimidine-2,4,6-trione	Adenosine A3 receptor	ADORA3	P0DMS8	0.101614
2177166	5-[5-(4-Methoxy-phenyl)-furan-2-ylmethylene]-pyrimidine-2,4,6-trione	Liver glycogen phosphorylase	PYGL	P06737	0.101614
2177166	5-[5-(4-Methoxy-phenyl)-furan-2-ylmethylene]-pyrimidine-2,4,6-trione	Sodium/glucose cotransporter 2	SLC5A2	P31639	0.101614
2177166	5-[5-(4-Methoxy-phenyl)-furan-2-ylmethylene]-pyrimidine-2,4,6-trione	Dual specificity mitogen-activated protein kinase kinase 1	MAP2K1	Q02750	0.101614
2177166	5-[5-(4-Methoxy-phenyl)-furan-2-ylmethylene]-pyrimidine-2,4,6-trione	Leukocyte elastase	ELANE	P08246	0.101614
2177166	5-[5-(4-Methoxy-phenyl)-furan-2-ylmethylene]-pyrimidine-2,4,6-trione	Hypoxia-inducible factor prolyl 4-hydroxylase	P4HTM	Q9NXG6	0.101614
2177166	5-[5-(4-Methoxy-phenyl)-furan-2-ylmethylene]-pyrimidine-2,4,6-trione	Sodium/glucose cotransporter 1	SLC5A1	P13866	0.101614
2177166	5-[5-(4-Methoxy-phenyl)-furan-2-ylmethylene]-pyrimidine-2,4,6-trione	NAD-dependent deacetylase sirtuin 2	SIRT2	Q8IXJ6	0.101614
2177166	5-[5-(4-Methoxy-phenyl)-furan-2-ylmethylene]-pyrimidine-2,4,6-trione	Tyrosine-protein kinase LCK	LCK	P06239	0.101614
5280863	kaempferol	NADPH oxidase 4	NOX4	Q9NPH5	1
5280863	kaempferol	Aldose reductase (by homology)	AKR1B1	P15121	1
5280863	kaempferol	Xanthine dehydrogenase	XDH	P47989	1
5280863	kaempferol	Tyrosinase	TYR	P14679	1
5280863	kaempferol	Tyrosine-protein kinase receptor FLT3	FLT3	P36888	1
5280863	kaempferol	Carbonic anhydrase II	CA2	P00918	1
5280863	kaempferol	Arachidonate 5-lipoxygenase	ALOX5	P09917	1
5280863	kaempferol	Carbonic anhydrase VII	CA7	P43166	1
5280863	kaempferol	Estradiol 17-beta-dehydrogenase 2	HSD17B2	P37059	1
5280863	kaempferol	Multidrug resistance-associated protein 1	ABCC1	P33527	1
5280863	kaempferol	Estradiol 17-beta-dehydrogenase 1	HSD17B1	P14061	1
5280863	kaempferol	Aryl hydrocarbon receptor	AHR	P35869	1
5280863	kaempferol	Carbonic anhydrase XII	CA12	O43570	1
5280863	kaempferol	Estrogen-related receptor alpha	ESRRA	P11474	1
5280863	kaempferol	P-glycoprotein 1	ABCB1	P08183	1
5280863	kaempferol	Cytochrome P450 1B1	CYP1B1	Q16678	1
5280863	kaempferol	ATP-binding cassette sub-family G member 2	ABCG2	Q9UNQ0	1
5280863	kaempferol	Adenosine A1 receptor (by homology)	ADORA1	P30542	0.795047
5280863	kaempferol	Carbonic anhydrase IV	CA4	P22748	0.795047
5280863	kaempferol	Acetylcholinesterase	ACHE	P22303	0.768469
5280863	kaempferol	Monoamine oxidase A	MAOA	P21397	0.65802
5280863	kaempferol	Glyoxalase I	GLO1	Q04760	0.65802
5280863	kaempferol	Tyrosine-protein kinase SYK	SYK	P43405	0.65802
5280863	kaempferol	Glycogen synthase kinase-3 beta	GSK3B	P49841	0.65802
5280863	kaempferol	Matrix metalloproteinase 9	MMP9	P14780	0.65802
5280863	kaempferol	Matrix metalloproteinase 2	MMP2	P08253	0.65802
5280863	kaempferol	Arachidonate 15-lipoxygenase	ALOX15	P16050	0.649781
5280863	kaempferol	Arachidonate 12-lipoxygenase	ALOX12	P18054	0.633326
5280863	kaempferol	Receptor-type tyrosine-protein phosphatase S	PTPRS	Q13332	0.608446
5280863	kaempferol	Adenosine A2a receptor (by homology)	ADORA2A	P29274	0.567302
5280863	kaempferol	Cyclin-dependent kinase 5 activator 1	CDK5R1	Q15078	0.517921
5280863	kaempferol	Cyclin-dependent kinase 5	CDK5	Q00535	0.517921
5280863	kaempferol	Cyclin-dependent kinase 1	CDK1	P06493	0.517921
5280863	kaempferol	G2/mitotic-specific cyclin-B1	CCNB1	P14635	0.517921
5280863	kaempferol	G2/mitotic-specific cyclin-B2	CCNB2	O95067	0.517921
5280863	kaempferol	G2/mitotic-specific cyclin-B3	CCNB3	Q8WWL7	0.517921
5280863	kaempferol	Arginase-1 (by homology)	ARG1	P05089	0.517921
5280863	kaempferol	G-protein coupled receptor 35	GPR35	Q9HC97	0.50153
5280863	kaempferol	Estrogen receptor beta	ESR2	Q92731	0.50153
5280863	kaempferol	Death-associated protein kinase 1	DAPK1	P53355	0.50153
5280863	kaempferol	DNA-3-methyladenine glycosylase	MPG	P29372	0.50153
5280863	kaempferol	Solute carrier family 22 member 12	SLC22A12	Q96S37	0.50153
5280863	kaempferol	Transthyretin	TTR	P02766	0.484896
5280863	kaempferol	Aldo-keto reductase family 1 member B10	AKR1B10	O60218	0.484896
5280863	kaempferol	Tankyrase-2	TNKS2	Q9H2K2	0.484896
5280863	kaempferol	Tankyrase-1	TNKS	O95271	0.484896
5280863	kaempferol	Cyclin-dependent kinase 6	CDK6	Q00534	0.476836
5280863	kaempferol	Cyclin-dependent kinase 2	CDK2	P24941	0.476836
5280863	kaempferol	Cytochrome P450 19A1	CYP19A1	P11511	0.427205
5280863	kaempferol	Casein kinase II alpha	CSNK2A1	P68400	0.427205
5280863	kaempferol	Epidermal growth factor receptor erbB1	EGFR	P00533	0.402643
5280863	kaempferol	Vasopressin V2 receptor	AVPR2	P30518	0.402643
5280863	kaempferol	Insulin-like growth factor I receptor	IGF1R	P08069	0.402643
5280863	kaempferol	Thrombin	F2	P00734	0.402643
5280863	kaempferol	Serine/threonine-protein kinase PIM1	PIM1	P11309	0.402643
5280863	kaempferol	Serine/threonine-protein kinase Aurora-B	AURKB	Q96GD4	0.402643
5280863	kaempferol	Dopamine D4 receptor	DRD4	P21917	0.402643
5280863	kaempferol	Myeloperoxidase	MPO	P05164	0.402643
5280863	kaempferol	PI3-kinase p85-alpha subunit	PIK3R1	P27986	0.402643
5280863	kaempferol	Liver glycogen phosphorylase	PYGL	P06737	0.402643
5280863	kaempferol	Carbonic anhydrase I	CA1	P00915	0.402643
5280863	kaempferol	Tyrosine-protein kinase SRC	SRC	P12931	0.402643
5280863	kaempferol	Focal adhesion kinase 1	PTK2	Q05397	0.402643
5280863	kaempferol	Vascular endothelial growth factor receptor 2	KDR	P35968	0.402643
5280863	kaempferol	Matrix metalloproteinase 13	MMP13	P45452	0.402643
5280863	kaempferol	Matrix metalloproteinase 3	MMP3	P08254	0.402643
5280863	kaempferol	Carbonic anhydrase III	CA3	P07451	0.402643
5280863	kaempferol	Serine/threonine-protein kinase PLK1	PLK1	P53350	0.402643
5280863	kaempferol	Carbonic anhydrase VI	CA6	P23280	0.402643
5280863	kaempferol	Cyclin-dependent kinase 1	CDK1	P06493	0.402643
5280863	kaempferol	Protein kinase N1	PKN1	Q16512	0.402643
5280863	kaempferol	Carbonic anhydrase XIV	CA14	Q9ULX7	0.402643
5280863	kaempferol	Carbonic anhydrase IX	CA9	Q16790	0.402643
5280863	kaempferol	Hepatocyte growth factor receptor	MET	P08581	0.402643
5280863	kaempferol	Serine/threonine-protein kinase NEK2	NEK2	P51955	0.402643
5280863	kaempferol	Interleukin-8 receptor A	CXCR1	P25024	0.402643
5280863	kaempferol	CaM kinase II beta	CAMK2B	Q13554	0.402643
5280863	kaempferol	ALK tyrosine kinase receptor	ALK	Q9UM73	0.402643
5280863	kaempferol	Serine/threonine-protein kinase AKT	AKT1	P31749	0.402643
5280863	kaempferol	Serine/threonine-protein kinase NEK6	NEK6	Q9HC98	0.402643
5280863	kaempferol	Phospholipase A2 group 1B	PLA2G1B	P04054	0.402643
5280863	kaempferol	Carbonic anhydrase VA	CA5A	P35218	0.402643
5280863	kaempferol	Beta-secretase 1	BACE1	P56817	0.402643
5280863	kaempferol	Tyrosine-protein kinase receptor UFO	AXL	P30530	0.402643
5280863	kaempferol	NUAK family SNF1-like kinase 1	NUAK1	O60285	0.402643
5280863	kaempferol	Aldo-keto reductase family 1 member C2 (by homology)	AKR1C2	P52895	0.402643
5280863	kaempferol	Aldo-keto reductase family 1 member C1 (by homology)	AKR1C1	Q04828	0.402643
5280863	kaempferol	Aldo-keto-reductase family 1 member C3 (by homology)	AKR1C3	P42330	0.402643
5280863	kaempferol	Aldo-keto reductase family 1 member C4 (by homology)	AKR1C4	P17516	0.402643
5280863	kaempferol	Carbonic anhydrase XIII (by homology)	CA13	Q8N1Q1	0.402643
5280863	kaempferol	Aldehyde reductase (by homology)	AKR1A1	P14550	0.402643
5280863	kaempferol	Beta amyloid A4 protein	APP	P05067	0.295453
5280863	kaempferol	Poly [ADP-ribose] polymerase-1	PARP1	P09874	0.295453
5280863	kaempferol	Matrix metalloproteinase 12	MMP12	P39900	0.295453
5280863	kaempferol	Lymphocyte differentiation antigen CD38	CD38	P28907	0.295453
5280863	kaempferol	DNA topoisomerase I (by homology)	TOP1	P11387	0.295453
5280863	kaempferol	Estrogen receptor alpha	ESR1	P03372	0.270837
5280863	kaempferol	Cyclooxygenase-2	PTGS2	P35354	0.270837
5280863	kaempferol	Cystic fibrosis transmembrane conductance regulator	CFTR	P13569	0.270837
5280863	kaempferol	6-phosphofructo-2-kinase/fructose-2,6-bisphosphatase 3	PFKFB3	Q16875	0.262582
5280863	kaempferol	AMY1C	AMY1A	P04745	0.237885
5280863	kaempferol	G protein-coupled receptor kinase 6	GRK6	P43250	0.237885
5280863	kaempferol	Telomerase reverse transcriptase	TERT	O14746	0.229686
5280863	kaempferol	Microtubule-associated protein tau	MAPT	P10636	0.171979
94162	Sugiol	Estradiol 17-beta-dehydrogenase 1	HSD17B1	P14061	0.127303
94162	Sugiol	Steryl-sulfatase	STS	P08842	0.127303
94162	Sugiol	DNA polymerase alpha subunit	POLA1	P09884	0.119404
94162	Sugiol	Cytochrome P450 19A1	CYP19A1	P11511	0.111502
94162	Sugiol	Thromboxane A2 receptor	TBXA2R	P21731	0.111502
94162	Sugiol	Estrogen receptor alpha	ESR1	P03372	0.111502
94162	Sugiol	Estrogen receptor beta	ESR2	Q92731	0.111502
94162	Sugiol	Glucocorticoid receptor	NR3C1	P04150	0.111502
94162	Sugiol	Androgen Receptor	AR	P10275	0.111502
94162	Sugiol	LXR-alpha	NR1H3	Q13133	0.111502
94162	Sugiol	Serotonin 2b (5-HT2b) receptor	HTR2B	P41595	0.111502
94162	Sugiol	Vascular endothelial growth factor receptor 2	KDR	P35968	0.111502
94162	Sugiol	Retinoid X receptor alpha	RXRA	P19793	0.111502
94162	Sugiol	Phospholipase A2 group V	PLA2G5	P39877	0.111502
94162	Sugiol	Sterol 26-hydroxylase, mitochondrial	CYP27A1	Q02318	0.111502
94162	Sugiol	Arachidonate 5-lipoxygenase	ALOX5	P09917	0.111502
94162	Sugiol	LXR-beta	NR1H2	P55055	0.111502
94162	Sugiol	Melanocortin receptor 4	MC4R	P32245	0.111502
94162	Sugiol	ELAV-like protein 1	ELAVL1	Q15717	0.111502
94162	Sugiol	Cytochrome P450 24A1	CYP24A1	Q07973	0.111502
94162	Sugiol	Testis-specific androgen-binding protein	SHBG	P04278	0.111502
94162	Sugiol	Protein kinase C (PKC)	PRKCZ	Q05513	0.111502
94162	Sugiol	Phospholipase A2 group IIA	PLA2G2A	P14555	0.111502
94162	Sugiol	Arachidonate 15-lipoxygenase	ALOX15	P16050	0.111502
94162	Sugiol	Nitric oxide synthase, inducible (by homology)	NOS2	P35228	0.111502
94162	Sugiol	Translocator protein (by homology)	TSPO	P30536	0.111502
94162	Sugiol	Histone deacetylase 2	HDAC2	Q92769	0.111502
94162	Sugiol	Acetylcholinesterase	ACHE	P22303	0.111502
94162	Sugiol	Serotonin transporter	SLC6A4	P31645	0.111502
94162	Sugiol	SUMO-activating enzyme subunit 1	SAE1	Q9UBE0	0.111502
94162	Sugiol	Cyclooxygenase-2	PTGS2	P35354	0.111502
94162	Sugiol	Calcium sensing receptor	CASR	P41180	0.111502
94162	Sugiol	Carbonic anhydrase XII	CA12	O43570	0.111502
94162	Sugiol	Estradiol 17-beta-dehydrogenase 2	HSD17B2	P37059	0.111502
94162	Sugiol	Leucine-rich repeat serine/threonine-protein kinase 2	LRRK2	Q5S007	0.111502
94162	Sugiol	Tyrosine-protein kinase SRC	SRC	P12931	0.111502
94162	Sugiol	Hepatocyte nuclear factor 4-alpha	HNF4A	P41235	0.111502
94162	Sugiol	Phosphodiesterase 2A	PDE2A	O00408	0.111502
94162	Sugiol	Phosphodiesterase 10A	PDE10A	Q9Y233	0.111502
94162	Sugiol	Monoamine oxidase B	MAOB	P27338	0.111502
94162	Sugiol	G-protein coupled bile acid receptor 1	GPBAR1	Q8TDU6	0.111502
94162	Sugiol	Mineralocorticoid receptor	NR3C2	P08235	0.111502
94162	Sugiol	Myosin light chain kinase, smooth muscle	MYLK	Q15746	0.111502
94162	Sugiol	Retinoid X receptor gamma (by homology)	RXRG	P48443	0.111502
94162	Sugiol	ADAMTS5	ADAMTS5	Q9UNA0	0.111502
94162	Sugiol	Poly [ADP-ribose] polymerase-1	PARP1	P09874	0.111502
94162	Sugiol	Metabotropic glutamate receptor 1	GRM1	Q13255	0.111502
94162	Sugiol	P2X purinoceptor 7	P2RX7	Q99572	0.111502
94162	Sugiol	Monoamine oxidase A	MAOA	P21397	0.111502
10212	Imperatorin	Monoamine oxidase A	MAOA	P21397	0.108771
10212	Imperatorin	Acetylcholinesterase	ACHE	P22303	0.100579
10212	Imperatorin	Voltage-gated potassium channel subunit Kv1.3	KCNA3	P22001	0.100579
10212	Imperatorin	Beta-secretase 1	BACE1	P56817	0.100579
10212	Imperatorin	Cytochrome P450 1A2	CYP1A2	P05177	0.100579
10212	Imperatorin	Gamma-aminobutyric acid receptor subunit beta-3	GABRB3	P28472	0.100579
10212	Imperatorin	Gamma-aminobutyric acid receptor subunit alpha-3	GABRA3	P34903	0.100579
10212	Imperatorin	Gamma-aminobutyric acid receptor subunit gamma-2	GABRG2	P18507	0.100579
10212	Imperatorin	Gamma-aminobutyric acid receptor subunit alpha-5	GABRA5	P31644	0.100579
10212	Imperatorin	Gamma-aminobutyric acid receptor subunit alpha-2	GABRA2	P47869	0.100579
10212	Imperatorin	Cytochrome P450 19A1	CYP19A1	P11511	0.100579
10212	Imperatorin	MAP kinase p38 alpha	MAPK14	Q16539	0.100579
10212	Imperatorin	Nitric oxide synthase, inducible	NOS2	P35228	0.100579
10212	Imperatorin	Adenosine A1 receptor (by homology)	ADORA1	P30542	0.100579
10212	Imperatorin	Phosphodiesterase 10A	PDE10A	Q9Y233	0.100579
10212	Imperatorin	Adenosine A2b receptor	ADORA2B	P29275	0.100579
10212	Imperatorin	Nerve growth factor receptor Trk-A	NTRK1	P04629	0.100579
10212	Imperatorin	Histone deacetylase 3	HDAC3	O15379	0.100579
10212	Imperatorin	Alpha-2a adrenergic receptor	ADRA2A	P08913	0.100579
10212	Imperatorin	Adrenergic receptor alpha-2	ADRA2C	P18825	0.100579
10212	Imperatorin	Histone deacetylase 2	HDAC2	Q92769	0.100579
10212	Imperatorin	Alpha-2b adrenergic receptor	ADRA2B	P18089	0.100579
10212	Imperatorin	Alpha-1b adrenergic receptor	ADRA1B	P35368	0.100579
10212	Imperatorin	Tyrosine-protein kinase JAK2	JAK2	O60674	0.100579
10212	Imperatorin	Histone deacetylase 1	HDAC1	Q13547	0.100579
10212	Imperatorin	Casein kinase I delta	CSNK1D	P48730	0.100579
10212	Imperatorin	Protein farnesyltransferase/geranylgeranyltransferase type-1 subunit alpha	FNTA	P49354	0.100579
10212	Imperatorin	Protein farnesyltransferase subunit beta	FNTB	P49356
10212	Imperatorin	Geranylgeranyl transferase type I beta subunit	PGGT1B	P53609	0.100579
10212	Imperatorin	Protein farnesyltransferase/geranylgeranyltransferase type-1 subunit alpha	FNTA	P49354
10212	Imperatorin	Geranylgeranyl transferase type I beta subunit	PGGT1B	P53609	0.100579
10212	Imperatorin	Prostanoid EP1 receptor	PTGER1	P34995	0.100579
10212	Imperatorin	Cyclin-dependent kinase 2	CDK2	P24941	0.100579
10212	Imperatorin	G1/S-specific cyclin-E1	CCNE1	P24864	0.100579
10212	Imperatorin	G1/S-specific cyclin-E2	CCNE2	O96020	0.100579
10212	Imperatorin	Trace amine-associated receptor 1 (by homology)	TAAR1	Q96RJ0	0.100579
10212	Imperatorin	Serine/threonine-protein kinase mTOR	MTOR	P42345	0.100579
10212	Imperatorin	PI3-kinase p110-delta subunit	PIK3CD	O00329	0.100579
10212	Imperatorin	PI3-kinase p110-beta subunit	PIK3CB	P42338	0.100579
10212	Imperatorin	Metabotropic glutamate receptor 5	GRM5	P41594	0.100579
10212	Imperatorin	PI3-kinase p110-gamma subunit	PIK3CG	P48736	0.100579
10212	Imperatorin	Melanin-concentrating hormone receptor 1	MCHR1	Q99705	0.100579
10212	Imperatorin	PI3-kinase p110-alpha subunit	PIK3CA	P42336	0.100579
10212	Imperatorin	Phosphodiesterase 5A	PDE5A	O76074	0.100579
10212	Imperatorin	DNA-dependent protein kinase	PRKDC	P78527	0.100579
10212	Imperatorin	Heat shock factor protein 1	HSF1	Q00613	0.100579
10212	Imperatorin	Muscle glycogen synthase	GYS1	P13807	0.100579
10212	Imperatorin	Bombesin receptor subtype-3	BRS3	P32247	0.100579
10212	Imperatorin	TGF-beta receptor type I	TGFBR1	P36897	0.100579
10212	Imperatorin	Protein tyrosine kinase 2 beta	PTK2B	Q14289	0.100579
10212	Imperatorin	Monoamine oxidase B	MAOB	P27338	0.100579
10212	Imperatorin	Anandamide amidohydrolase	FAAH	O00519	0.100579
10212	Imperatorin	Dual specificity protein kinase CLK4	CLK4	Q9HAZ1	0.100579
10212	Imperatorin	Glycogen synthase kinase-3 alpha	GSK3A	P49840	0.100579
10212	Imperatorin	Dual-specificity tyrosine-phosphorylation regulated kinase 1A (by homology)	DYRK1A	Q13627	0.100579
10212	Imperatorin	Phosphodiesterase 8B	PDE8B	O95263	0.100579
10212	Imperatorin	Progesterone receptor	PGR	P06401	0.100579
10212	Imperatorin	MAP kinase-activated protein kinase 2	MAPKAPK2	P49137	0.100579
10212	Imperatorin	c-Jun N-terminal kinase 1	MAPK8	P45983	0.100579
10212	Imperatorin	Casein kinase I gamma 1	CSNK1G1	Q9HCP0	0.100579
10212	Imperatorin	C-C chemokine receptor type 2	CCR2	P41597	0.100579
10212	Imperatorin	Alpha-1a adrenergic receptor (by homology)	ADRA1A	P35348	0.100579
10212	Imperatorin	Protoporphyrinogen oxidase	PPOX	P50336	0.100579
10212	Imperatorin	Serine/threonine-protein kinase PIM1	PIM1	P11309	0.100579
10212	Imperatorin	Carbonic anhydrase IX	CA9	Q16790	0.100579
10212	Imperatorin	Prostanoid EP4 receptor	PTGER4	P35408	0.100579
10212	Imperatorin	Prostanoid EP2 receptor	PTGER2	P43116	0.100579
10212	Imperatorin	Prostanoid EP3 receptor	PTGER3	P43115	0.100579
10212	Imperatorin	Orexin receptor 2	HCRTR2	O43614	0.100579
10212	Imperatorin	Orexin receptor 1	HCRTR1	O43613	0.100579
10212	Imperatorin	Butyrylcholinesterase	BCHE	P06276	0.100579
10212	Imperatorin	Cannabinoid receptor 1	CNR1	P21554	0.100579
10212	Imperatorin	Cyclooxygenase-1	PTGS1	P23219	0.100579
10212	Imperatorin	Cyclooxygenase-2	PTGS2	P35354	0.100579
10212	Imperatorin	Cannabinoid receptor 2	CNR2	P34972	0.100579
10212	Imperatorin	Dual specificity mitogen-activated protein kinase kinase 1	MAP2K1	Q02750	0.100579
10212	Imperatorin	Steroid 5-alpha-reductase 1	SRD5A1	P18405	0.100579
10212	Imperatorin	Tyrosine-protein kinase receptor FLT3	FLT3	P36888	0.100579
10212	Imperatorin	Tyrosine-protein kinase JAK1	JAK1	P23458	0.100579
10212	Imperatorin	Tyrosine-protein kinase TYK2	TYK2	P29597	0.100579
10212	Imperatorin	N-acylsphingosine-amidohydrolase	NAAA	Q02083	0.100579
10212	Imperatorin	Carbonic anhydrase XII	CA12	O43570	0.100579
10212	Imperatorin	Platelet activating factor receptor	PTAFR	P25105	0.100579
10212	Imperatorin	Histamine H3 receptor	HRH3	Q9Y5N1	0.100579
445638	Palmitoleic Acid	Peroxisome proliferator-activated receptor gamma	PPARG	P37231	0.982961
445638	Palmitoleic Acid	Peroxisome proliferator-activated receptor alpha	PPARA	Q07869	0.982961
445638	Palmitoleic Acid	Peroxisome proliferator-activated receptor delta	PPARD	Q03181	0.982961
445638	Palmitoleic Acid	Fatty acid binding protein adipocyte	FABP4	P15090	0.661621
445638	Palmitoleic Acid	Fatty acid binding protein muscle	FABP3	P05413	0.661621
445638	Palmitoleic Acid	Fatty acid binding protein epidermal	FABP5	Q01469	0.661621
445638	Palmitoleic Acid	Anandamide amidohydrolase	FAAH	O00519	0.616299
445638	Palmitoleic Acid	Telomerase reverse transcriptase	TERT	O14746	0.616299
445638	Palmitoleic Acid	Fatty acid-binding protein, liver	FABP1	P07148	0.616299
445638	Palmitoleic Acid	Acyl-CoA desaturase	SCD	O00767	0.407592
445638	Palmitoleic Acid	Free fatty acid receptor 1	FFAR1	O14842	0.253265
445638	Palmitoleic Acid	Cyclooxygenase-1	PTGS1	P23219	0.189729
445638	Palmitoleic Acid	Protein-tyrosine phosphatase 1B	PTPN1	P18031	0.180616
445638	Palmitoleic Acid	T-cell protein-tyrosine phosphatase	PTPN2	P17706	0.180616
445638	Palmitoleic Acid	Prostaglandin E synthase	PTGES	O14684	0.108018
445638	Palmitoleic Acid	Protein-tyrosine phosphatase 1C	PTPN6	P29350	0.108018
445638	Palmitoleic Acid	Carboxylesterase 2	CES2	O00748	0.108018
445638	Palmitoleic Acid	Prolyl endopeptidase	PREP	P48147	0.108018
