# Supplementary material for: Efficacy and Key Materials of East Asian Herbal Medicine Combined with Conventional Medicine on Inflammatory Skin Lesion in Patients with Psoriasis Vulgaris: A Meta-Analysis, Integrated Data Mining, and Network Pharmacology
Source: Pharmaceuticals (Basel). 2023 Aug 15;16(8):1160. doi: 10.3390/ph16081160 (PMC10459676; doi:10.3390/ph16081160)
Supplement: Supplementary file 1 [file pharmaceuticals-16-01160-s001.zip › Supplementary Table S5.xlsx]

## Sheet: Supplementary Material S10
Supplementary Table S5. Detailed information on potential psoriasis targets from the GeneCard database
Gene symbol	Gene description	Gene Card Id	Relevance score	Database
EGFR	Epidermal Growth Factor Receptor	GC07P055019	0.321271	https://www.genecards.org/cgi-bin/carddisp.pl?gene=EGFR
MMP9	Matrix Metallopeptidase 9	GC20P046008	1.61002	https://www.genecards.org/cgi-bin/carddisp.pl?gene=MMP9
SLC2A1	Solute Carrier Family 2 Member 1	GC01M042925	1.51695	https://www.genecards.org/cgi-bin/carddisp.pl?gene=SLC2A1
CTNNB1	Catenin Beta 1	GC03P041236	1.33025	https://www.genecards.org/cgi-bin/carddisp.pl?gene=CTNNB1
PDGFRB	Platelet Derived Growth Factor Receptor Beta	GC05M150113	1.17464	https://www.genecards.org/cgi-bin/carddisp.pl?gene=PDGFRB
KIT	KIT Proto-Oncogene, Receptor Tyrosine Kinase	GC04P054657	0.321271	https://www.genecards.org/cgi-bin/carddisp.pl?gene=KIT
ESR1	Estrogen Receptor 1	GC06P151656	0.227173	https://www.genecards.org/cgi-bin/carddisp.pl?gene=ESR1
SOD1	Superoxide Dismutase 1	GC21P031659	0.227173	https://www.genecards.org/cgi-bin/carddisp.pl?gene=SOD1
STAT3	Signal Transducer And Activator Of Transcription 3	GC17M042313	0.227173	https://www.genecards.org/cgi-bin/carddisp.pl?gene=STAT3
NFKB1	Nuclear Factor Kappa B Subunit 1	GC04P102501	2.77141	https://www.genecards.org/cgi-bin/carddisp.pl?gene=NFKB1
TGFB1	Transforming Growth Factor Beta 1	GC19M041301	2.02796	https://www.genecards.org/cgi-bin/carddisp.pl?gene=TGFB1
PLAU	Plasminogen Activator, Urokinase	GC10P073909	1.49591	https://www.genecards.org/cgi-bin/carddisp.pl?gene=PLAU
CCND1	Cyclin D1	GC11P069641	1.33025	https://www.genecards.org/cgi-bin/carddisp.pl?gene=CCND1
NOTCH1	Notch Receptor 1	GC09M137632	1.23615	https://www.genecards.org/cgi-bin/carddisp.pl?gene=NOTCH1
TYK2	Tyrosine Kinase 2	GC19M010350	1.17464	https://www.genecards.org/cgi-bin/carddisp.pl?gene=TYK2
JAK2	Janus Kinase 2	GC09P004985	0.227173	https://www.genecards.org/cgi-bin/carddisp.pl?gene=JAK2
STAT1	Signal Transducer And Activator Of Transcription 1	GC02M190908	0.227173	https://www.genecards.org/cgi-bin/carddisp.pl?gene=STAT1
TNF	Tumor Necrosis Factor	GC06P087731	7.52796	https://www.genecards.org/cgi-bin/carddisp.pl?gene=TNF
NGF	Nerve Growth Factor	GC01M115285	1.46333	https://www.genecards.org/cgi-bin/carddisp.pl?gene=NGF
NOTCH2	Notch Receptor 2	GC01M119911	1.40245	https://www.genecards.org/cgi-bin/carddisp.pl?gene=NOTCH2
ITGB2	Integrin Subunit Beta 2	GC21M044885	1.33025	https://www.genecards.org/cgi-bin/carddisp.pl?gene=ITGB2
TLR2	Toll Like Receptor 2	GC04P153684	1.33025	https://www.genecards.org/cgi-bin/carddisp.pl?gene=TLR2
IL2RA	Interleukin 2 Receptor Subunit Alpha	GC10M006010	1.23615	https://www.genecards.org/cgi-bin/carddisp.pl?gene=IL2RA
TLR4	Toll Like Receptor 4	GC09P117704	1.23615	https://www.genecards.org/cgi-bin/carddisp.pl?gene=TLR4
GRIN1	Glutamate Ionotropic Receptor NMDA Type Subunit 1	GC09P137146	0.642542	https://www.genecards.org/cgi-bin/carddisp.pl?gene=GRIN1
ADAM17	ADAM Metallopeptidase Domain 17	GC02M009488	0.321271	https://www.genecards.org/cgi-bin/carddisp.pl?gene=ADAM17
CAT	Catalase	GC11P034460	0.321271	https://www.genecards.org/cgi-bin/carddisp.pl?gene=CAT
EGF	Epidermal Growth Factor	GC04P109912	0.321271	https://www.genecards.org/cgi-bin/carddisp.pl?gene=EGF
MAPK14	Mitogen-Activated Protein Kinase 14	GC06P087896	0.321271	https://www.genecards.org/cgi-bin/carddisp.pl?gene=MAPK14
PLAT	Plasminogen Activator, Tissue Type	GC08M042174	0.321271	https://www.genecards.org/cgi-bin/carddisp.pl?gene=PLAT
CBL	Cbl Proto-Oncogene	GC11P119206	0.227173	https://www.genecards.org/cgi-bin/carddisp.pl?gene=CBL
ICAM1	Intercellular Adhesion Molecule 1	GC19P010638	2.20195	https://www.genecards.org/cgi-bin/carddisp.pl?gene=ICAM1
IL6	Interleukin 6	GC07P022725	2.02796	https://www.genecards.org/cgi-bin/carddisp.pl?gene=IL6
BCL2	BCL2 Apoptosis Regulator	GC18M063123	1.74818	https://www.genecards.org/cgi-bin/carddisp.pl?gene=BCL2
DPP4	Dipeptidyl Peptidase 4	GC02M161992	1.23615	https://www.genecards.org/cgi-bin/carddisp.pl?gene=DPP4
FAS	Fas Cell Surface Death Receptor	GC10P093591	1.23615	https://www.genecards.org/cgi-bin/carddisp.pl?gene=FAS
APOE	Apolipoprotein E	GC19P069967	0.718384	https://www.genecards.org/cgi-bin/carddisp.pl?gene=APOE
VCP	Valosin Containing Protein	GC09M035056	0.321271	https://www.genecards.org/cgi-bin/carddisp.pl?gene=VCP
ANPEP	Alanyl Aminopeptidase, Membrane	GC15M089784	0.227173	https://www.genecards.org/cgi-bin/carddisp.pl?gene=ANPEP
MME	Membrane Metalloendopeptidase	GC03P155024	0.227173	https://www.genecards.org/cgi-bin/carddisp.pl?gene=MME
IFNG	Interferon Gamma	GC12M068154	3.82787	https://www.genecards.org/cgi-bin/carddisp.pl?gene=IFNG
VDR	Vitamin D Receptor	GC12M047841	3.1928	https://www.genecards.org/cgi-bin/carddisp.pl?gene=VDR
CTLA4	Cytotoxic T-Lymphocyte Associated Protein 4	GC02P203854	3.153	https://www.genecards.org/cgi-bin/carddisp.pl?gene=CTLA4
CDH1	Cadherin 1	GC16P068737	1.88126	https://www.genecards.org/cgi-bin/carddisp.pl?gene=CDH1
CD40	CD40 Molecule	GC20P046118	1.40245	https://www.genecards.org/cgi-bin/carddisp.pl?gene=CD40
BDNF	Brain Derived Neurotrophic Factor	GC11M027654	1.23615	https://www.genecards.org/cgi-bin/carddisp.pl?gene=BDNF
C3	Complement C3	GC19M006677	1.23615	https://www.genecards.org/cgi-bin/carddisp.pl?gene=C3
CASP3	Caspase 3	GC04M184627	1.23615	https://www.genecards.org/cgi-bin/carddisp.pl?gene=CASP3
WNT5A	Wnt Family Member 5A	GC03M055465	1.19327	https://www.genecards.org/cgi-bin/carddisp.pl?gene=WNT5A
ITPR1	Inositol 1,4,5-Trisphosphate Receptor Type 1	GC03P004486	1.17464	https://www.genecards.org/cgi-bin/carddisp.pl?gene=ITPR1
NFKBIA	NFKB Inhibitor Alpha	GC14M035401	1.17464	https://www.genecards.org/cgi-bin/carddisp.pl?gene=NFKBIA
CD4	CD4 Molecule	GC12P006786	1.00898	https://www.genecards.org/cgi-bin/carddisp.pl?gene=CD4
TNFRSF1A	TNF Receptor Superfamily Member 1A	GC12M006328	0.556458	https://www.genecards.org/cgi-bin/carddisp.pl?gene=TNFRSF1A
TNFRSF1B	TNF Receptor Superfamily Member 1B	GC01P012272	0.556458	https://www.genecards.org/cgi-bin/carddisp.pl?gene=TNFRSF1B
IL1RN	Interleukin 1 Receptor Antagonist	GC02P123138	0.321271	https://www.genecards.org/cgi-bin/carddisp.pl?gene=IL1RN
SERPINE1	Serpin Family E Member 1	GC07P101127	0.321271	https://www.genecards.org/cgi-bin/carddisp.pl?gene=SERPINE1
TNFRSF10B	TNF Receptor Superfamily Member 10b	GC08M023020	0.321271	https://www.genecards.org/cgi-bin/carddisp.pl?gene=TNFRSF10B
APOA1	Apolipoprotein A1	GC11M116835	0.227173	https://www.genecards.org/cgi-bin/carddisp.pl?gene=APOA1
FOS	Fos Proto-Oncogene, AP-1 Transcription Factor Subunit	GC14P075278	0.227173	https://www.genecards.org/cgi-bin/carddisp.pl?gene=FOS
MAPK8	Mitogen-Activated Protein Kinase 8	GC10P048306	0.227173	https://www.genecards.org/cgi-bin/carddisp.pl?gene=MAPK8
CCL2	C-C Motif Chemokine Ligand 2	GC17P034255	2.98177	https://www.genecards.org/cgi-bin/carddisp.pl?gene=CCL2
GATA3	GATA Binding Protein 3	GC10P008045	1.88126	https://www.genecards.org/cgi-bin/carddisp.pl?gene=GATA3
SLC6A4	Solute Carrier Family 6 Member 4	GC17M030194	1.74818	https://www.genecards.org/cgi-bin/carddisp.pl?gene=SLC6A4
HIF1A	Hypoxia Inducible Factor 1 Subunit Alpha	GC14P061695	1.40245	https://www.genecards.org/cgi-bin/carddisp.pl?gene=HIF1A
CAV1	Caveolin 1	GC07P116524	1.33025	https://www.genecards.org/cgi-bin/carddisp.pl?gene=CAV1
CCR5	C-C Motif Chemokine Receptor 5	GC03P047182	1.23615	https://www.genecards.org/cgi-bin/carddisp.pl?gene=CCR5
NOS2	Nitric Oxide Synthase 2	GC17M027756	1.17464	https://www.genecards.org/cgi-bin/carddisp.pl?gene=NOS2
EDN1	Endothelin 1	GC06P012256	1.00898	https://www.genecards.org/cgi-bin/carddisp.pl?gene=EDN1
GRN	Granulin Precursor	GC17P044345	1.00898	https://www.genecards.org/cgi-bin/carddisp.pl?gene=GRN
RIPK1	Receptor Interacting Serine/Threonine Kinase 1	GC06P003313	0.393475	https://www.genecards.org/cgi-bin/carddisp.pl?gene=RIPK1
HSPD1	Heat Shock Protein Family D (Hsp60) Member 1	GC02M197486	0.321271	https://www.genecards.org/cgi-bin/carddisp.pl?gene=HSPD1
MUC1	Mucin 1, Cell Surface Associated	GC01M155185	0.321271	https://www.genecards.org/cgi-bin/carddisp.pl?gene=MUC1
PTGS2	Prostaglandin-Endoperoxide Synthase 2	GC01M186640	0.321271	https://www.genecards.org/cgi-bin/carddisp.pl?gene=PTGS2
RUNX1	RUNX Family Transcription Factor 1	GC21M034787	0.321271	https://www.genecards.org/cgi-bin/carddisp.pl?gene=RUNX1
ANXA1	Annexin A1	GC09P073151	0.227173	https://www.genecards.org/cgi-bin/carddisp.pl?gene=ANXA1
ITGA3	Integrin Subunit Alpha 3	GC17P050055	0.227173	https://www.genecards.org/cgi-bin/carddisp.pl?gene=ITGA3
PTGER2	Prostaglandin E Receptor 2	GC14P052314	0.227173	https://www.genecards.org/cgi-bin/carddisp.pl?gene=PTGER2
SLCO1B1	Solute Carrier Organic Anion Transporter Family Member 1B1	GC12P022777	0.227173	https://www.genecards.org/cgi-bin/carddisp.pl?gene=SLCO1B1
VEGFA	Vascular Endothelial Growth Factor A	GC06P043770	0.227173	https://www.genecards.org/cgi-bin/carddisp.pl?gene=VEGFA
WT1	WT1 Transcription Factor	GC11M032365	0.227173	https://www.genecards.org/cgi-bin/carddisp.pl?gene=WT1
IL12B	Interleukin 12B	GC05M159314	5.98479	https://www.genecards.org/cgi-bin/carddisp.pl?gene=IL12B
HLA-DRB1	Major Histocompatibility Complex, Class II, DR Beta 1	GC06M069255	4.50476	https://www.genecards.org/cgi-bin/carddisp.pl?gene=HLA-DRB1
TNFAIP3	TNF Alpha Induced Protein 3	GC06P137866	4.07333	https://www.genecards.org/cgi-bin/carddisp.pl?gene=TNFAIP3
IL10	Interleukin 10	GC01M206767	2.59761	https://www.genecards.org/cgi-bin/carddisp.pl?gene=IL10
TAP1	Transporter 1, ATP Binding Cassette Subfamily B Member	GC06M069271	2.42912	https://www.genecards.org/cgi-bin/carddisp.pl?gene=TAP1
STAT2	Signal Transducer And Activator Of Transcription 2	GC12M056341	2.41079	https://www.genecards.org/cgi-bin/carddisp.pl?gene=STAT2
CD14	CD14 Molecule	GC05M140631	2.33923	https://www.genecards.org/cgi-bin/carddisp.pl?gene=CD14
PTPN22	Protein Tyrosine Phosphatase Non-Receptor Type 22	GC01M113813	2.01796	https://www.genecards.org/cgi-bin/carddisp.pl?gene=PTPN22
ITGAL	Integrin Subunit Alpha L	GC16P030472	1.98337	https://www.genecards.org/cgi-bin/carddisp.pl?gene=ITGAL
ITGA4	Integrin Subunit Alpha 4	GC02P181456	1.82039	https://www.genecards.org/cgi-bin/carddisp.pl?gene=ITGA4
ANGPT2	Angiopoietin 2	GC08M006499	1.65408	https://www.genecards.org/cgi-bin/carddisp.pl?gene=ANGPT2
MTHFR	Methylenetetrahydrofolate Reductase	GC01M011785	1.65152	https://www.genecards.org/cgi-bin/carddisp.pl?gene=MTHFR
NOD2	Nucleotide Binding Oligomerization Domain Containing 2	GC16P050693	1.56544	https://www.genecards.org/cgi-bin/carddisp.pl?gene=NOD2
CDH3	Cadherin 3	GC16P068637	1.51695	https://www.genecards.org/cgi-bin/carddisp.pl?gene=CDH3
VEGFC	Vascular Endothelial Growth Factor C	GC04M176683	1.46333	https://www.genecards.org/cgi-bin/carddisp.pl?gene=VEGFC
IFIH1	Interferon Induced With Helicase C Domain 1	GC02M162267	1.40181	https://www.genecards.org/cgi-bin/carddisp.pl?gene=IFIH1
CD79A	CD79a Molecule	GC19P041877	1.33025	https://www.genecards.org/cgi-bin/carddisp.pl?gene=CD79A
IRF7	Interferon Regulatory Factor 7	GC11M000612	1.33025	https://www.genecards.org/cgi-bin/carddisp.pl?gene=IRF7
AHR	Aryl Hydrocarbon Receptor	GC07P016916	1.23615	https://www.genecards.org/cgi-bin/carddisp.pl?gene=AHR
BCL2L1	BCL2 Like 1	GC20M031664	1.23615	https://www.genecards.org/cgi-bin/carddisp.pl?gene=BCL2L1
CFB	Complement Factor B	GC06P031945	1.23615	https://www.genecards.org/cgi-bin/carddisp.pl?gene=CFB
CHRNA3	Cholinergic Receptor Nicotinic Alpha 3 Subunit	GC15M118958	1.23615	https://www.genecards.org/cgi-bin/carddisp.pl?gene=CHRNA3
CYP1A1	Cytochrome P450 Family 1 Subfamily A Member 1	GC15M074719	1.23615	https://www.genecards.org/cgi-bin/carddisp.pl?gene=CYP1A1
CYP1B1	Cytochrome P450 Family 1 Subfamily B Member 1	GC02M038066	1.23615	https://www.genecards.org/cgi-bin/carddisp.pl?gene=CYP1B1
FASLG	Fas Ligand	GC01P172628	1.23615	https://www.genecards.org/cgi-bin/carddisp.pl?gene=FASLG
GBA1	Glucosylceramidase Beta 1	GC01M155318	1.23615	https://www.genecards.org/cgi-bin/carddisp.pl?gene=GBA1
NLRP3	NLR Family Pyrin Domain Containing 3	GC01P247415	1.23615	https://www.genecards.org/cgi-bin/carddisp.pl?gene=NLRP3
PSAP	Prosaposin	GC10M071816	1.23615	https://www.genecards.org/cgi-bin/carddisp.pl?gene=PSAP
ADRA1B	Adrenoceptor Alpha 1B	GC05P159867	1.17464	https://www.genecards.org/cgi-bin/carddisp.pl?gene=ADRA1B
CAMK2G	Calcium/Calmodulin Dependent Protein Kinase II Gamma	GC10M073812	1.17464	https://www.genecards.org/cgi-bin/carddisp.pl?gene=CAMK2G
ETS1	ETS Proto-Oncogene 1, Transcription Factor	GC11M128458	1.17464	https://www.genecards.org/cgi-bin/carddisp.pl?gene=ETS1
TP63	Tumor Protein P63	GC03P189598	1.17464	https://www.genecards.org/cgi-bin/carddisp.pl?gene=TP63
VCL	Vinculin	GC10P073995	1.17464	https://www.genecards.org/cgi-bin/carddisp.pl?gene=VCL
CLU	Clusterin	GC08M027596	1.00898	https://www.genecards.org/cgi-bin/carddisp.pl?gene=CLU
CYSLTR2	Cysteinyl Leukotriene Receptor 2	GC13P048653	1.00898	https://www.genecards.org/cgi-bin/carddisp.pl?gene=CYSLTR2
LBR	Lamin B Receptor	GC01M225401	1.00898	https://www.genecards.org/cgi-bin/carddisp.pl?gene=LBR
CALCR	Calcitonin Receptor	GC07M093424	0.966098	https://www.genecards.org/cgi-bin/carddisp.pl?gene=CALCR
SETD2	SET Domain Containing 2, Histone Lysine Methyltransferase	GC03M047033	0.966098	https://www.genecards.org/cgi-bin/carddisp.pl?gene=SETD2
MSN	Moesin	GC0XP065588	0.601043	https://www.genecards.org/cgi-bin/carddisp.pl?gene=MSN
IL1B	Interleukin 1 Beta	GC02M112829	0.507974	https://www.genecards.org/cgi-bin/carddisp.pl?gene=IL1B
ALOX5	Arachidonate 5-Lipoxygenase	GC10P045374	0.393475	https://www.genecards.org/cgi-bin/carddisp.pl?gene=ALOX5
DNM1L	Dynamin 1 Like	GC12P032679	0.321271	https://www.genecards.org/cgi-bin/carddisp.pl?gene=DNM1L
ITGAM	Integrin Subunit Alpha M	GC16P041958	0.321271	https://www.genecards.org/cgi-bin/carddisp.pl?gene=ITGAM
CHRNA7	Cholinergic Receptor Nicotinic Alpha 7 Subunit	GC15P031923	0.227173	https://www.genecards.org/cgi-bin/carddisp.pl?gene=CHRNA7
GZMB	Granzyme B	GC14M024630	0.227173	https://www.genecards.org/cgi-bin/carddisp.pl?gene=GZMB
JUN	Jun Proto-Oncogene, AP-1 Transcription Factor Subunit	GC01M058780	0.227173	https://www.genecards.org/cgi-bin/carddisp.pl?gene=JUN
LAMC2	Laminin Subunit Gamma 2	GC01P183186	0.227173	https://www.genecards.org/cgi-bin/carddisp.pl?gene=LAMC2
LCAT	Lecithin-Cholesterol Acyltransferase	GC16M067939	0.227173	https://www.genecards.org/cgi-bin/carddisp.pl?gene=LCAT
NFATC1	Nuclear Factor Of Activated T Cells 1	GC18P079395	0.227173	https://www.genecards.org/cgi-bin/carddisp.pl?gene=NFATC1
NRP1	Neuropilin 1	GC10M033177	0.227173	https://www.genecards.org/cgi-bin/carddisp.pl?gene=NRP1
PDCD1	Programmed Cell Death 1	GC02M241849	0.227173	https://www.genecards.org/cgi-bin/carddisp.pl?gene=PDCD1
PIK3CG	Phosphatidylinositol-4,5-Bisphosphate 3-Kinase Catalytic Subunit Gamma	GC07P106865	0.227173	https://www.genecards.org/cgi-bin/carddisp.pl?gene=PIK3CG
PLA2G2A	Phospholipase A2 Group IIA	GC01M019975	0.227173	https://www.genecards.org/cgi-bin/carddisp.pl?gene=PLA2G2A
IL4	Interleukin 4	GC05P132673	3.355	https://www.genecards.org/cgi-bin/carddisp.pl?gene=IL4
FOXP3	Forkhead Box P3	GC0XM049250	1.82039	https://www.genecards.org/cgi-bin/carddisp.pl?gene=FOXP3
REL	REL Proto-Oncogene, NF-KB Subunit	GC02P060881	1.49591	https://www.genecards.org/cgi-bin/carddisp.pl?gene=REL
NOTCH4	Notch Receptor 4	GC06M069238	1.40245	https://www.genecards.org/cgi-bin/carddisp.pl?gene=NOTCH4
HMGB1	High Mobility Group Box 1	GC13M030456	1.33025	https://www.genecards.org/cgi-bin/carddisp.pl?gene=HMGB1
ANGPT1	Angiopoietin 1	GC08M107246	1.23615	https://www.genecards.org/cgi-bin/carddisp.pl?gene=ANGPT1
CARD11	Caspase Recruitment Domain Family Member 11	GC07M002906	1.23615	https://www.genecards.org/cgi-bin/carddisp.pl?gene=CARD11
AGER	Advanced Glycosylation End-Product Specific Receptor	GC06M032180	1.17464	https://www.genecards.org/cgi-bin/carddisp.pl?gene=AGER
CARM1	Coactivator Associated Arginine Methyltransferase 1	GC19P010871	1.17464	https://www.genecards.org/cgi-bin/carddisp.pl?gene=CARM1
FYN	FYN Proto-Oncogene, Src Family Tyrosine Kinase	GC06M111660	1.17464	https://www.genecards.org/cgi-bin/carddisp.pl?gene=FYN
OPRL1	Opioid Related Nociceptin Receptor 1	GC20P064080	0.966098	https://www.genecards.org/cgi-bin/carddisp.pl?gene=OPRL1
IRF1	Interferon Regulatory Factor 1	GC05M132440	0.393475	https://www.genecards.org/cgi-bin/carddisp.pl?gene=IRF1
ITGAX	Integrin Subunit Alpha X	GC16P041969	0.393475	https://www.genecards.org/cgi-bin/carddisp.pl?gene=ITGAX
PTGER3	Prostaglandin E Receptor 3	GC01M070852	0.393475	https://www.genecards.org/cgi-bin/carddisp.pl?gene=PTGER3
CASP9	Caspase 9	GC01M015491	0.227173	https://www.genecards.org/cgi-bin/carddisp.pl?gene=CASP9
CDH5	Cadherin 5	GC16P066366	0.227173	https://www.genecards.org/cgi-bin/carddisp.pl?gene=CDH5
DUSP1	Dual Specificity Phosphatase 1	GC05M172768	0.227173	https://www.genecards.org/cgi-bin/carddisp.pl?gene=DUSP1
KRT1	Keratin 1	GC12M052674	0.227173	https://www.genecards.org/cgi-bin/carddisp.pl?gene=KRT1
LEP	Leptin	GC07P128241	0.227173	https://www.genecards.org/cgi-bin/carddisp.pl?gene=LEP
MBL2	Mannose Binding Lectin 2	GC10M052760	0.227173	https://www.genecards.org/cgi-bin/carddisp.pl?gene=MBL2
TGFA	Transforming Growth Factor Alpha	GC02M070447	0.227173	https://www.genecards.org/cgi-bin/carddisp.pl?gene=TGFA
IL23R	Interleukin 23 Receptor	GC01P067138	8.46977	https://www.genecards.org/cgi-bin/carddisp.pl?gene=IL23R
HLA-B	Major Histocompatibility Complex, Class I, B	GC06M069166	5.73538	https://www.genecards.org/cgi-bin/carddisp.pl?gene=HLA-B
HLA-A	Major Histocompatibility Complex, Class I, A	GC06P087685	3.99075	https://www.genecards.org/cgi-bin/carddisp.pl?gene=HLA-A
ERAP1	Endoplasmic Reticulum Aminopeptidase 1	GC05M096760	3.88892	https://www.genecards.org/cgi-bin/carddisp.pl?gene=ERAP1
IL17F	Interleukin 17F	GC06M069573	2.39301	https://www.genecards.org/cgi-bin/carddisp.pl?gene=IL17F
CALCA	Calcitonin Related Polypeptide Alpha	GC11M014945	1.98337	https://www.genecards.org/cgi-bin/carddisp.pl?gene=CALCA
VCAM1	Vascular Cell Adhesion Molecule 1	GC01P100719	1.82039	https://www.genecards.org/cgi-bin/carddisp.pl?gene=VCAM1
BIRC5	Baculoviral IAP Repeat Containing 5	GC17P078214	1.74818	https://www.genecards.org/cgi-bin/carddisp.pl?gene=BIRC5
SELE	Selectin E	GC01M169722	1.74818	https://www.genecards.org/cgi-bin/carddisp.pl?gene=SELE
RIGI	RNA Sensor RIG-I	GC09M032458	1.68262	https://www.genecards.org/cgi-bin/carddisp.pl?gene=RIGI
KITLG	KIT Ligand	GC12M088492	1.56544	https://www.genecards.org/cgi-bin/carddisp.pl?gene=KITLG
IL13	Interleukin 13	GC05P132656	1.49591	https://www.genecards.org/cgi-bin/carddisp.pl?gene=IL13
CD80	CD80 Molecule	GC03M119524	1.40245	https://www.genecards.org/cgi-bin/carddisp.pl?gene=CD80
IL5	Interleukin 5	GC05M132541	1.40245	https://www.genecards.org/cgi-bin/carddisp.pl?gene=IL5
SMAD7	SMAD Family Member 7	GC18M048919	1.40245	https://www.genecards.org/cgi-bin/carddisp.pl?gene=SMAD7
KLF4	KLF Transcription Factor 4	GC09M107484	1.40181	https://www.genecards.org/cgi-bin/carddisp.pl?gene=KLF4
CCR2	C-C Motif Chemokine Receptor 2	GC03P047181	1.23615	https://www.genecards.org/cgi-bin/carddisp.pl?gene=CCR2
LCN2	Lipocalin 2	GC09P128149	1.23615	https://www.genecards.org/cgi-bin/carddisp.pl?gene=LCN2
TBX21	T-Box Transcription Factor 21	GC17P047733	1.23615	https://www.genecards.org/cgi-bin/carddisp.pl?gene=TBX21
REV3L	REV3 Like, DNA Directed Polymerase Zeta Catalytic Subunit	GC06M111299	1.17464	https://www.genecards.org/cgi-bin/carddisp.pl?gene=REV3L
AOC3	Amine Oxidase Copper Containing 3	GC17P042851	1.00898	https://www.genecards.org/cgi-bin/carddisp.pl?gene=AOC3
BDKRB2	Bradykinin Receptor B2	GC14P096205	1.00898	https://www.genecards.org/cgi-bin/carddisp.pl?gene=BDKRB2
CTSG	Cathepsin G	GC14M024573	1.00898	https://www.genecards.org/cgi-bin/carddisp.pl?gene=CTSG
GJB2	Gap Junction Protein Beta 2	GC13M020187	1.00898	https://www.genecards.org/cgi-bin/carddisp.pl?gene=GJB2
IL17RA	Interleukin 17 Receptor A	GC22P039613	0.966098	https://www.genecards.org/cgi-bin/carddisp.pl?gene=IL17RA
STIP1	Stress Induced Phosphoprotein 1	GC11P064407	0.601043	https://www.genecards.org/cgi-bin/carddisp.pl?gene=STIP1
HRH1	Histamine Receptor H1	GC03P012712	0.556458	https://www.genecards.org/cgi-bin/carddisp.pl?gene=HRH1
CCL11	C-C Motif Chemokine Ligand 11	GC17P034285	0.321271	https://www.genecards.org/cgi-bin/carddisp.pl?gene=CCL11
HSPA1A	Heat Shock Protein Family A (Hsp70) Member 1A	GC06P087759	0.321271	https://www.genecards.org/cgi-bin/carddisp.pl?gene=HSPA1A
IL1R1	Interleukin 1 Receptor Type 1	GC02P102136	0.321271	https://www.genecards.org/cgi-bin/carddisp.pl?gene=IL1R1
ADIPOQ	Adiponectin, C1Q And Collagen Domain Containing	GC03P186842	0.227173	https://www.genecards.org/cgi-bin/carddisp.pl?gene=ADIPOQ
EZR	Ezrin	GC06M158765	0.227173	https://www.genecards.org/cgi-bin/carddisp.pl?gene=EZR
OSMR	Oncostatin M Receptor	GC05P038845	0.227173	https://www.genecards.org/cgi-bin/carddisp.pl?gene=OSMR
PTGER4	Prostaglandin E Receptor 4	GC05P040679	0.227173	https://www.genecards.org/cgi-bin/carddisp.pl?gene=PTGER4
SELP	Selectin P	GC01M169558	0.227173	https://www.genecards.org/cgi-bin/carddisp.pl?gene=SELP
SERPINF2	Serpin Family F Member 2	GC17P001742	0.227173	https://www.genecards.org/cgi-bin/carddisp.pl?gene=SERPINF2
THBS1	Thrombospondin 1	GC15P039581	0.227173	https://www.genecards.org/cgi-bin/carddisp.pl?gene=THBS1
TNFRSF4	TNF Receptor Superfamily Member 4	GC01M001211	0.227173	https://www.genecards.org/cgi-bin/carddisp.pl?gene=TNFRSF4
TRAF6	TNF Receptor Associated Factor 6	GC11M036467	0.227173	https://www.genecards.org/cgi-bin/carddisp.pl?gene=TRAF6
HLA-C	Major Histocompatibility Complex, Class I, C	GC06M069165	22.6769	https://www.genecards.org/cgi-bin/carddisp.pl?gene=HLA-C
TRAF3IP2	TRAF3 Interacting Protein 2	GC06M111555	7.99519	https://www.genecards.org/cgi-bin/carddisp.pl?gene=TRAF3IP2
IL17A	Interleukin 17A	GC06P052186	6.46169	https://www.genecards.org/cgi-bin/carddisp.pl?gene=IL17A
KRT17	Keratin 17	GC17M041619	2.9472	https://www.genecards.org/cgi-bin/carddisp.pl?gene=KRT17
POU5F1	POU Class 5 Homeobox 1	GC06M069160	2.5771	https://www.genecards.org/cgi-bin/carddisp.pl?gene=POU5F1
CCR4	C-C Motif Chemokine Receptor 4	GC03P032951	2.02796	https://www.genecards.org/cgi-bin/carddisp.pl?gene=CCR4
CXCL10	C-X-C Motif Chemokine Ligand 10	GC04M076021	1.93489	https://www.genecards.org/cgi-bin/carddisp.pl?gene=CXCL10
LTA	Lymphotoxin Alpha	GC06P087729	1.79593	https://www.genecards.org/cgi-bin/carddisp.pl?gene=LTA
HLA-DPB1	Major Histocompatibility Complex, Class II, DP Beta 1	GC06P087776	1.74818	https://www.genecards.org/cgi-bin/carddisp.pl?gene=HLA-DPB1
CCR7	C-C Motif Chemokine Receptor 7	GC17M049365	1.7476	https://www.genecards.org/cgi-bin/carddisp.pl?gene=CCR7
CDH13	Cadherin 13	GC16P082626	1.6905	https://www.genecards.org/cgi-bin/carddisp.pl?gene=CDH13
IL18	Interleukin 18	GC11M112143	1.65408	https://www.genecards.org/cgi-bin/carddisp.pl?gene=IL18
IL1A	Interleukin 1 Alpha	GC02M112773	1.52256	https://www.genecards.org/cgi-bin/carddisp.pl?gene=IL1A
TSPO	Translocator Protein	GC22P043151	1.46333	https://www.genecards.org/cgi-bin/carddisp.pl?gene=TSPO
F2RL1	F2R Like Trypsin Receptor 1	GC05P076818	1.42691	https://www.genecards.org/cgi-bin/carddisp.pl?gene=F2RL1
TAP2	Transporter 2, ATP Binding Cassette Subfamily B Member	GC06M032821	1.40245	https://www.genecards.org/cgi-bin/carddisp.pl?gene=TAP2
CHRNA5	Cholinergic Receptor Nicotinic Alpha 5 Subunit	GC15P078565	1.23615	https://www.genecards.org/cgi-bin/carddisp.pl?gene=CHRNA5
CHRNB3	Cholinergic Receptor Nicotinic Beta 3 Subunit	GC08P042697	1.23615	https://www.genecards.org/cgi-bin/carddisp.pl?gene=CHRNB3
CHRNB4	Cholinergic Receptor Nicotinic Beta 4 Subunit	GC15M078624	1.23615	https://www.genecards.org/cgi-bin/carddisp.pl?gene=CHRNB4
CR1	Complement C3b/C4b Receptor 1 (Knops Blood Group)	GC01P207496	1.23615	https://www.genecards.org/cgi-bin/carddisp.pl?gene=CR1
CD74	CD74 Molecule	GC05M150378	1.17464	https://www.genecards.org/cgi-bin/carddisp.pl?gene=CD74
IL12RB2	Interleukin 12 Receptor Subunit Beta 2	GC01P067307	1.17464	https://www.genecards.org/cgi-bin/carddisp.pl?gene=IL12RB2
PRDX5	Peroxiredoxin 5	GC11P064435	1.17464	https://www.genecards.org/cgi-bin/carddisp.pl?gene=PRDX5
UBE2L3	Ubiquitin Conjugating Enzyme E2 L3	GC22P021549	1.17464	https://www.genecards.org/cgi-bin/carddisp.pl?gene=UBE2L3
VEGFB	Vascular Endothelial Growth Factor B	GC11P064234	1.17464	https://www.genecards.org/cgi-bin/carddisp.pl?gene=VEGFB
CHI3L1	Chitinase 3 Like 1	GC01M203148	1.00898	https://www.genecards.org/cgi-bin/carddisp.pl?gene=CHI3L1
CSTA	Cystatin A	GC03P122325	0.966098	https://www.genecards.org/cgi-bin/carddisp.pl?gene=CSTA
TNFRSF10A	TNF Receptor Superfamily Member 10a	GC08M023190	0.393475	https://www.genecards.org/cgi-bin/carddisp.pl?gene=TNFRSF10A
CX3CL1	C-X3-C Motif Chemokine Ligand 1	GC16P057372	0.321271	https://www.genecards.org/cgi-bin/carddisp.pl?gene=CX3CL1
DDX41	DEAD-Box Helicase 41	GC05M177511	0.321271	https://www.genecards.org/cgi-bin/carddisp.pl?gene=DDX41
TNFSF10	TNF Superfamily Member 10	GC03M172505	0.321271	https://www.genecards.org/cgi-bin/carddisp.pl?gene=TNFSF10
TNFSF13	TNF Superfamily Member 13	GC17P007558	0.321271	https://www.genecards.org/cgi-bin/carddisp.pl?gene=TNFSF13
TNFSF13B	TNF Superfamily Member 13b	GC13P108251	0.321271	https://www.genecards.org/cgi-bin/carddisp.pl?gene=TNFSF13B
BAK1	BCL2 Antagonist/Killer 1	GC06M033572	0.227173	https://www.genecards.org/cgi-bin/carddisp.pl?gene=BAK1
C5AR1	Complement C5a Receptor 1	GC19P047290	0.227173	https://www.genecards.org/cgi-bin/carddisp.pl?gene=C5AR1
CD151	CD151 Molecule (Raph Blood Group)	GC11P001966	0.227173	https://www.genecards.org/cgi-bin/carddisp.pl?gene=CD151
CD274	CD274 Molecule	GC09P005450	0.227173	https://www.genecards.org/cgi-bin/carddisp.pl?gene=CD274
CSF1	Colony Stimulating Factor 1	GC01P109911	0.227173	https://www.genecards.org/cgi-bin/carddisp.pl?gene=CSF1
IFNB1	Interferon Beta 1	GC09M021077	0.227173	https://www.genecards.org/cgi-bin/carddisp.pl?gene=IFNB1
IL3	Interleukin 3	GC05P132060	0.227173	https://www.genecards.org/cgi-bin/carddisp.pl?gene=IL3
KLK6	Kallikrein Related Peptidase 6	GC19M050958	0.227173	https://www.genecards.org/cgi-bin/carddisp.pl?gene=KLK6
LAMA2	Laminin Subunit Alpha 2	GC06P128863	0.227173	https://www.genecards.org/cgi-bin/carddisp.pl?gene=LAMA2
NFATC2	Nuclear Factor Of Activated T Cells 2	GC20M051386	0.227173	https://www.genecards.org/cgi-bin/carddisp.pl?gene=NFATC2
PLAUR	Plasminogen Activator, Urokinase Receptor	GC19M043646	0.227173	https://www.genecards.org/cgi-bin/carddisp.pl?gene=PLAUR
RPTOR	Regulatory Associated Protein Of MTOR Complex 1	GC17P080544	0.227173	https://www.genecards.org/cgi-bin/carddisp.pl?gene=RPTOR
TG	Thyroglobulin	GC08P132866	0.227173	https://www.genecards.org/cgi-bin/carddisp.pl?gene=TG
XBP1	X-Box Binding Protein 1	GC22M028794	0.227173	https://www.genecards.org/cgi-bin/carddisp.pl?gene=XBP1
CCR6	C-C Motif Chemokine Receptor 6	GC06P167111	4.09508	https://www.genecards.org/cgi-bin/carddisp.pl?gene=CCR6
CXCR3	C-X-C Motif Chemokine Receptor 3	GC0XM071615	2.30406	https://www.genecards.org/cgi-bin/carddisp.pl?gene=CXCR3
CD86	CD86 Molecule	GC03P122055	1.82039	https://www.genecards.org/cgi-bin/carddisp.pl?gene=CD86
IL15	Interleukin 15	GC04P141636	1.74818	https://www.genecards.org/cgi-bin/carddisp.pl?gene=IL15
CCL5	C-C Motif Chemokine Ligand 5	GC17M035871	1.6905	https://www.genecards.org/cgi-bin/carddisp.pl?gene=CCL5
RUNX3	RUNX Family Transcription Factor 3	GC01M024899	1.62899	https://www.genecards.org/cgi-bin/carddisp.pl?gene=RUNX3
ICAM3	Intercellular Adhesion Molecule 3	GC19M010412	1.40181	https://www.genecards.org/cgi-bin/carddisp.pl?gene=ICAM3
C4A	Complement C4A (Rodgers Blood Group)	GC06P087763	1.23615	https://www.genecards.org/cgi-bin/carddisp.pl?gene=C4A
CSF2	Colony Stimulating Factor 2	GC05P132073	1.23615	https://www.genecards.org/cgi-bin/carddisp.pl?gene=CSF2
HLA-G	Major Histocompatibility Complex, Class I, G	GC06P087672	1.23615	https://www.genecards.org/cgi-bin/carddisp.pl?gene=HLA-G
TNFSF15	TNF Superfamily Member 15	GC09M114784	1.23615	https://www.genecards.org/cgi-bin/carddisp.pl?gene=TNFSF15
KCNH7	Potassium Voltage-Gated Channel Subfamily H Member 7	GC02M162371	1.17464	https://www.genecards.org/cgi-bin/carddisp.pl?gene=KCNH7
SOCS1	Suppressor Of Cytokine Signaling 1	GC16M012363	1.17464	https://www.genecards.org/cgi-bin/carddisp.pl?gene=SOCS1
TNXB	Tenascin XB	GC06M069227	1.17464	https://www.genecards.org/cgi-bin/carddisp.pl?gene=TNXB
LAMC1	Laminin Subunit Gamma 1	GC01P182992	1.00898	https://www.genecards.org/cgi-bin/carddisp.pl?gene=LAMC1
AQP7	Aquaporin 7	GC09M033384	0.966098	https://www.genecards.org/cgi-bin/carddisp.pl?gene=AQP7
TMPRSS15	Transmembrane Serine Protease 15	GC21M018269	0.966098	https://www.genecards.org/cgi-bin/carddisp.pl?gene=TMPRSS15
OSM	Oncostatin M	GC22M030262	0.454346	https://www.genecards.org/cgi-bin/carddisp.pl?gene=OSM
S100A9	S100 Calcium Binding Protein A9	GC01P153357	0.321271	https://www.genecards.org/cgi-bin/carddisp.pl?gene=S100A9
CXCL11	C-X-C Motif Chemokine Ligand 11	GC04M076033	0.227173	https://www.genecards.org/cgi-bin/carddisp.pl?gene=CXCL11
IL18R1	Interleukin 18 Receptor 1	GC02P102311	0.227173	https://www.genecards.org/cgi-bin/carddisp.pl?gene=IL18R1
PTGER1	Prostaglandin E Receptor 1	GC19M014577	0.227173	https://www.genecards.org/cgi-bin/carddisp.pl?gene=PTGER1
SLC22A1	Solute Carrier Family 22 Member 1	GC06P160121	0.227173	https://www.genecards.org/cgi-bin/carddisp.pl?gene=SLC22A1
TNFSF4	TNF Superfamily Member 4	GC01M173183	0.227173	https://www.genecards.org/cgi-bin/carddisp.pl?gene=TNFSF4
TOLLIP	Toll Interacting Protein	GC11M001274	0.227173	https://www.genecards.org/cgi-bin/carddisp.pl?gene=TOLLIP
HLA-DQB1	Major Histocompatibility Complex, Class II, DQ Beta 1	GC06M069264	3.65973	https://www.genecards.org/cgi-bin/carddisp.pl?gene=HLA-DQB1
KRT16	Keratin 16	GC17M041609	2.99568	https://www.genecards.org/cgi-bin/carddisp.pl?gene=KRT16
IL1RL2	Interleukin 1 Receptor Like 2	GC02P102186	2.441	https://www.genecards.org/cgi-bin/carddisp.pl?gene=IL1RL2
KLK8	Kallikrein Related Peptidase 8	GC19M050996	2.3733	https://www.genecards.org/cgi-bin/carddisp.pl?gene=KLK8
CCL4	C-C Motif Chemokine Ligand 4	GC17P036103	1.6905	https://www.genecards.org/cgi-bin/carddisp.pl?gene=CCL4
CCL17	C-C Motif Chemokine Ligand 17	GC16P057415	1.61002	https://www.genecards.org/cgi-bin/carddisp.pl?gene=CCL17
CD209	CD209 Molecule	GC19M007739	1.61002	https://www.genecards.org/cgi-bin/carddisp.pl?gene=CD209
FCGR3B	Fc Gamma Receptor IIIb	GC01M161623	1.51695	https://www.genecards.org/cgi-bin/carddisp.pl?gene=FCGR3B
SERPINA3	Serpin Family A Member 3	GC14P094612	1.4749	https://www.genecards.org/cgi-bin/carddisp.pl?gene=SERPINA3
IRF4	Interferon Regulatory Factor 4	GC06P000391	1.46333	https://www.genecards.org/cgi-bin/carddisp.pl?gene=IRF4
CD83	CD83 Molecule	GC06P014117	1.40245	https://www.genecards.org/cgi-bin/carddisp.pl?gene=CD83
GNL3	G Protein Nucleolar 3	GC03P052681	1.40245	https://www.genecards.org/cgi-bin/carddisp.pl?gene=GNL3
PRL	Prolactin	GC06M022287	1.33025	https://www.genecards.org/cgi-bin/carddisp.pl?gene=PRL
C4B	Complement C4B (Chido Blood Group)	GC06P032014	1.23615	https://www.genecards.org/cgi-bin/carddisp.pl?gene=C4B
CASP5	Caspase 5	GC11M104995	1.23615	https://www.genecards.org/cgi-bin/carddisp.pl?gene=CASP5
CHRNA6	Cholinergic Receptor Nicotinic Alpha 6 Subunit	GC08M042752	1.23615	https://www.genecards.org/cgi-bin/carddisp.pl?gene=CHRNA6
LAIR1	Leukocyte Associated Immunoglobulin Like Receptor 1	GC19M054351	1.23615	https://www.genecards.org/cgi-bin/carddisp.pl?gene=LAIR1
NLRP1	NLR Family Pyrin Domain Containing 1	GC17M005499	1.23615	https://www.genecards.org/cgi-bin/carddisp.pl?gene=NLRP1
TRIB3	Tribbles Pseudokinase 3	GC20P000361	1.23615	https://www.genecards.org/cgi-bin/carddisp.pl?gene=TRIB3
ANXA6	Annexin A6	GC05M151100	1.17464	https://www.genecards.org/cgi-bin/carddisp.pl?gene=ANXA6
EDEM1	ER Degradation Enhancing Alpha-Mannosidase Like Protein 1	GC03P005187	1.17464	https://www.genecards.org/cgi-bin/carddisp.pl?gene=EDEM1
LTB	Lymphotoxin Beta	GC06M069210	1.17464	https://www.genecards.org/cgi-bin/carddisp.pl?gene=LTB
RPS14	Ribosomal Protein S14	GC05M150443	1.17464	https://www.genecards.org/cgi-bin/carddisp.pl?gene=RPS14
SEC24C	SEC24 Homolog C, COPII Coat Complex Component	GC10P073744	1.17464	https://www.genecards.org/cgi-bin/carddisp.pl?gene=SEC24C
TIMP2	TIMP Metallopeptidase Inhibitor 2	GC17M078852	1.00898	https://www.genecards.org/cgi-bin/carddisp.pl?gene=TIMP2
ZFYVE9	Zinc Finger FYVE-Type Containing 9	GC01P052142	1.00898	https://www.genecards.org/cgi-bin/carddisp.pl?gene=ZFYVE9
AQP9	Aquaporin 9	GC15P058138	0.966098	https://www.genecards.org/cgi-bin/carddisp.pl?gene=AQP9
MCOLN1	Mucolipin TRP Cation Channel 1	GC19P007523	0.966098	https://www.genecards.org/cgi-bin/carddisp.pl?gene=MCOLN1
DST	Dystonin	GC06M056457	0.393475	https://www.genecards.org/cgi-bin/carddisp.pl?gene=DST
KRT10	Keratin 10	GC17M040818	0.393475	https://www.genecards.org/cgi-bin/carddisp.pl?gene=KRT10
CA3	Carbonic Anhydrase 3	GC08P085373	0.321271	https://www.genecards.org/cgi-bin/carddisp.pl?gene=CA3
IRF2	Interferon Regulatory Factor 2	GC04M184387	0.321271	https://www.genecards.org/cgi-bin/carddisp.pl?gene=IRF2
SELL	Selectin L	GC01M169690	0.321271	https://www.genecards.org/cgi-bin/carddisp.pl?gene=SELL
SERPINB2	Serpin Family B Member 2	GC18P063871	0.321271	https://www.genecards.org/cgi-bin/carddisp.pl?gene=SERPINB2
TOM1	Target Of Myb1 Membrane Trafficking Protein	GC22P035299	0.321271	https://www.genecards.org/cgi-bin/carddisp.pl?gene=TOM1
CD63	CD63 Molecule	GC12M055725	0.227173	https://www.genecards.org/cgi-bin/carddisp.pl?gene=CD63
CSF3	Colony Stimulating Factor 3	GC17P040015	0.227173	https://www.genecards.org/cgi-bin/carddisp.pl?gene=CSF3
CTSV	Cathepsin V	GC09M097029	0.227173	https://www.genecards.org/cgi-bin/carddisp.pl?gene=CTSV
CYP2J2	Cytochrome P450 Family 2 Subfamily J Member 2	GC01M059893	0.227173	https://www.genecards.org/cgi-bin/carddisp.pl?gene=CYP2J2
HBEGF	Heparin Binding EGF Like Growth Factor	GC05M140332	0.227173	https://www.genecards.org/cgi-bin/carddisp.pl?gene=HBEGF
KLRD1	Killer Cell Lectin Like Receptor D1	GC12P010226	0.227173	https://www.genecards.org/cgi-bin/carddisp.pl?gene=KLRD1
MAFB	MAF BZIP Transcription Factor B	GC20M040685	0.227173	https://www.genecards.org/cgi-bin/carddisp.pl?gene=MAFB
MB	Myoglobin	GC22M035606	0.227173	https://www.genecards.org/cgi-bin/carddisp.pl?gene=MB
RETN	Resistin	GC19P007669	0.227173	https://www.genecards.org/cgi-bin/carddisp.pl?gene=RETN
S100A8	S100 Calcium Binding Protein A8	GC01M153391	0.227173	https://www.genecards.org/cgi-bin/carddisp.pl?gene=S100A8
IL36RN	Interleukin 36 Receptor Antagonist	GC02P123137	12.4892	https://www.genecards.org/cgi-bin/carddisp.pl?gene=IL36RN
CARD14	Caspase Recruitment Domain Family Member 14	GC17P080170	11.9249	https://www.genecards.org/cgi-bin/carddisp.pl?gene=CARD14
CDSN	Corneodesmosin	GC06M031115	7.90269	https://www.genecards.org/cgi-bin/carddisp.pl?gene=CDSN
IL23A	Interleukin 23 Subunit Alpha	GC12P057394	3.43022	https://www.genecards.org/cgi-bin/carddisp.pl?gene=IL23A
HLA-DQA1	Major Histocompatibility Complex, Class II, DQ Alpha 1	GC06P087770	3.35132	https://www.genecards.org/cgi-bin/carddisp.pl?gene=HLA-DQA1
MGST2	Microsomal Glutathione S-Transferase 2	GC04P139665	2.86496	https://www.genecards.org/cgi-bin/carddisp.pl?gene=MGST2
CCL20	C-C Motif Chemokine Ligand 20	GC02P227846	2.78648	https://www.genecards.org/cgi-bin/carddisp.pl?gene=CCL20
IL22	Interleukin 22	GC12M068248	2.30406	https://www.genecards.org/cgi-bin/carddisp.pl?gene=IL22
CXCL8	C-X-C Motif Chemokine Ligand 8	GC04P073740	1.98337	https://www.genecards.org/cgi-bin/carddisp.pl?gene=CXCL8
KIR3DL1	Killer Cell Immunoglobulin Like Receptor, Three Ig Domains And Long Cytoplasmic Tail 1	GC19P070471	1.82039	https://www.genecards.org/cgi-bin/carddisp.pl?gene=KIR3DL1
POLR2C	RNA Polymerase II Subunit C	GC16P057462	1.74818	https://www.genecards.org/cgi-bin/carddisp.pl?gene=POLR2C
CCL3	C-C Motif Chemokine Ligand 3	GC17M036088	1.6905	https://www.genecards.org/cgi-bin/carddisp.pl?gene=CCL3
TNFSF12	TNF Superfamily Member 12	GC17P011456	1.65408	https://www.genecards.org/cgi-bin/carddisp.pl?gene=TNFSF12
CXCL9	C-X-C Motif Chemokine Ligand 9	GC04M076001	1.40245	https://www.genecards.org/cgi-bin/carddisp.pl?gene=CXCL9
GPT	Glutamic--Pyruvic Transaminase	GC08P144502	1.40245	https://www.genecards.org/cgi-bin/carddisp.pl?gene=GPT
TBXT	T-Box Transcription Factor T	GC06M166158	1.40245	https://www.genecards.org/cgi-bin/carddisp.pl?gene=TBXT
ANXA7	Annexin A7	GC10M073375	1.17464	https://www.genecards.org/cgi-bin/carddisp.pl?gene=ANXA7
CLIC4	Chloride Intracellular Channel 4	GC01P024745	1.17464	https://www.genecards.org/cgi-bin/carddisp.pl?gene=CLIC4
GPX3	Glutathione Peroxidase 3	GC05P150997	1.17464	https://www.genecards.org/cgi-bin/carddisp.pl?gene=GPX3
STX1B	Syntaxin 1B	GC16M030989	1.17464	https://www.genecards.org/cgi-bin/carddisp.pl?gene=STX1B
TCOF1	Treacle Ribosome Biogenesis Factor 1	GC05P150358	1.17464	https://www.genecards.org/cgi-bin/carddisp.pl?gene=TCOF1
ZMIZ1	Zinc Finger MIZ-Type Containing 1	GC10P079068	1.17464	https://www.genecards.org/cgi-bin/carddisp.pl?gene=ZMIZ1
ALOX15B	Arachidonate 15-Lipoxygenase Type B	GC17P008039	1.00898	https://www.genecards.org/cgi-bin/carddisp.pl?gene=ALOX15B
ATG16L1	Autophagy Related 16 Like 1	GC02P233258	1.00898	https://www.genecards.org/cgi-bin/carddisp.pl?gene=ATG16L1
RPL19	Ribosomal Protein L19	GC17P039200	0.966098	https://www.genecards.org/cgi-bin/carddisp.pl?gene=RPL19
BIRC7	Baculoviral IAP Repeat Containing 7	GC20P063235	0.321271	https://www.genecards.org/cgi-bin/carddisp.pl?gene=BIRC7
MEP1B	Meprin A Subunit Beta	GC18P032185	0.321271	https://www.genecards.org/cgi-bin/carddisp.pl?gene=MEP1B
KLK7	Kallikrein Related Peptidase 7	GC19M068278	0.227173	https://www.genecards.org/cgi-bin/carddisp.pl?gene=KLK7
LRBA	LPS Responsive Beige-Like Anchor Protein	GC04M150264	0.227173	https://www.genecards.org/cgi-bin/carddisp.pl?gene=LRBA
MEP1A	Meprin A Subunit Alpha	GC06P046793	0.227173	https://www.genecards.org/cgi-bin/carddisp.pl?gene=MEP1A
PTPA	Protein Phosphatase 2 Phosphatase Activator	GC09P129111	0.227173	https://www.genecards.org/cgi-bin/carddisp.pl?gene=PTPA
SRSF1	Serine And Arginine Rich Splicing Factor 1	GC17M058000	0.227173	https://www.genecards.org/cgi-bin/carddisp.pl?gene=SRSF1
TAC1	Tachykinin Precursor 1	GC07P097731	0.227173	https://www.genecards.org/cgi-bin/carddisp.pl?gene=TAC1
TNFRSF10D	TNF Receptor Superfamily Member 10d	GC08M023135	0.227173	https://www.genecards.org/cgi-bin/carddisp.pl?gene=TNFRSF10D
FLG	Filaggrin	GC01M152304	2.86796	https://www.genecards.org/cgi-bin/carddisp.pl?gene=FLG
S100A7	S100 Calcium Binding Protein A7	GC01M153457	2.39015	https://www.genecards.org/cgi-bin/carddisp.pl?gene=S100A7
CD200	CD200 Molecule	GC03P112332	1.56544	https://www.genecards.org/cgi-bin/carddisp.pl?gene=CD200
IL19	Interleukin 19	GC01P206770	1.4749	https://www.genecards.org/cgi-bin/carddisp.pl?gene=IL19
TMPRSS11D	Transmembrane Serine Protease 11D	GC04M067820	1.42691	https://www.genecards.org/cgi-bin/carddisp.pl?gene=TMPRSS11D
IFNA1	Interferon Alpha 1	GC09P021601	1.40245	https://www.genecards.org/cgi-bin/carddisp.pl?gene=IFNA1
SLURP1	Secreted LY6/PLAUR Domain Containing 1	GC08M142740	1.40245	https://www.genecards.org/cgi-bin/carddisp.pl?gene=SLURP1
MICB	MHC Class I Polypeptide-Related Sequence B	GC06P087725	1.40181	https://www.genecards.org/cgi-bin/carddisp.pl?gene=MICB
NAT2	N-Acetyltransferase 2	GC08P018391	1.33025	https://www.genecards.org/cgi-bin/carddisp.pl?gene=NAT2
ERAP2	Endoplasmic Reticulum Aminopeptidase 2	GC05P096875	1.23615	https://www.genecards.org/cgi-bin/carddisp.pl?gene=ERAP2
B3GNT2	UDP-GlcNAc:BetaGal Beta-1,3-N-Acetylglucosaminyltransferase 2	GC02P062196	1.17464	https://www.genecards.org/cgi-bin/carddisp.pl?gene=B3GNT2
BHLHE40	Basic Helix-Loop-Helix Family Member E40	GC03P004980	1.17464	https://www.genecards.org/cgi-bin/carddisp.pl?gene=BHLHE40
DDX39B	DExD-Box Helicase 39B	GC06M031530	1.17464	https://www.genecards.org/cgi-bin/carddisp.pl?gene=DDX39B
ELMO1	Engulfment And Cell Motility 1	GC07M036860	1.17464	https://www.genecards.org/cgi-bin/carddisp.pl?gene=ELMO1
G3BP1	G3BP Stress Granule Assembly Factor 1	GC05P151771	1.17464	https://www.genecards.org/cgi-bin/carddisp.pl?gene=G3BP1
LSM2	LSM2 Homolog, U6 Small Nuclear RNA And MRNA Degradation Associated	GC06M069224	1.17464	https://www.genecards.org/cgi-bin/carddisp.pl?gene=LSM2
MDC1	Mediator Of DNA Damage Checkpoint 1	GC06M069131	1.17464	https://www.genecards.org/cgi-bin/carddisp.pl?gene=MDC1
MSH5	MutS Homolog 5	GC06P087754	1.17464	https://www.genecards.org/cgi-bin/carddisp.pl?gene=MSH5
PERP	P53 Apoptosis Effector Related To PMP22	GC06M138088	1.17464	https://www.genecards.org/cgi-bin/carddisp.pl?gene=PERP
TSC22D1	TSC22 Domain Family Member 1	GC13M044432	1.17464	https://www.genecards.org/cgi-bin/carddisp.pl?gene=TSC22D1
XK	X-Linked Kx Blood Group Antigen, Kell And VPS13A Binding Protein	GC0XP037685	1.17464	https://www.genecards.org/cgi-bin/carddisp.pl?gene=XK
IAPP	Islet Amyloid Polypeptide	GC12P021354	1.00898	https://www.genecards.org/cgi-bin/carddisp.pl?gene=IAPP
KLK11	Kallikrein Related Peptidase 11	GC19M068282	1.00898	https://www.genecards.org/cgi-bin/carddisp.pl?gene=KLK11
GZMM	Granzyme M	GC19P000544	0.966098	https://www.genecards.org/cgi-bin/carddisp.pl?gene=GZMM
IL25	Interleukin 25	GC14P033600	0.966098	https://www.genecards.org/cgi-bin/carddisp.pl?gene=IL25
SH3BP2	SH3 Domain Binding Protein 2	GC04P002794	0.966098	https://www.genecards.org/cgi-bin/carddisp.pl?gene=SH3BP2
CCL26	C-C Motif Chemokine Ligand 26	GC07M075769	0.321271	https://www.genecards.org/cgi-bin/carddisp.pl?gene=CCL26
CCL28	C-C Motif Chemokine Ligand 28	GC05M043356	0.227173	https://www.genecards.org/cgi-bin/carddisp.pl?gene=CCL28
CST6	Cystatin E/M	GC11P070480	0.227173	https://www.genecards.org/cgi-bin/carddisp.pl?gene=CST6
KDSR	3-Ketodihydrosphingosine Reductase	GC18M063327	0.227173	https://www.genecards.org/cgi-bin/carddisp.pl?gene=KDSR
LGALS9	Galectin 9	GC17P027629	0.227173	https://www.genecards.org/cgi-bin/carddisp.pl?gene=LGALS9
RECK	Reversion Inducing Cysteine Rich Protein With Kazal Motifs	GC09P036036	0.227173	https://www.genecards.org/cgi-bin/carddisp.pl?gene=RECK
SERPINB3	Serpin Family B Member 3	GC18M063655	0.227173	https://www.genecards.org/cgi-bin/carddisp.pl?gene=SERPINB3
TCF19	Transcription Factor 19	GC06P087716	4.30551	https://www.genecards.org/cgi-bin/carddisp.pl?gene=TCF19
SERPINA12	Serpin Family A Member 12	GC14M094487	2.06887	https://www.genecards.org/cgi-bin/carddisp.pl?gene=SERPINA12
CCL22	C-C Motif Chemokine Ligand 22	GC16P057359	1.93489	https://www.genecards.org/cgi-bin/carddisp.pl?gene=CCL22
DEFB1	Defensin Beta 1	GC08M006870	1.74818	https://www.genecards.org/cgi-bin/carddisp.pl?gene=DEFB1
KIR3DL2	Killer Cell Immunoglobulin Like Receptor, Three Ig Domains And Long Cytoplasmic Tail 2	GC19P070473	1.74818	https://www.genecards.org/cgi-bin/carddisp.pl?gene=KIR3DL2
ZFYVE16	Zinc Finger FYVE-Type Containing 16	GC05P080407	1.4749	https://www.genecards.org/cgi-bin/carddisp.pl?gene=ZFYVE16
BTN3A1	Butyrophilin Subfamily 3 Member A1	GC06P026402	1.33025	https://www.genecards.org/cgi-bin/carddisp.pl?gene=BTN3A1
HLA-DMA	Major Histocompatibility Complex, Class II, DM Alpha	GC06M069276	1.33025	https://www.genecards.org/cgi-bin/carddisp.pl?gene=HLA-DMA
RARRES2	Retinoic Acid Receptor Responder 2	GC07M150333	1.33025	https://www.genecards.org/cgi-bin/carddisp.pl?gene=RARRES2
CDKAL1	CDK5 Regulatory Subunit Associated Protein 1 Like 1	GC06P020534	1.17464	https://www.genecards.org/cgi-bin/carddisp.pl?gene=CDKAL1
ECD	Ecdysoneless Cell Cycle Regulator	GC10M073130	1.17464	https://www.genecards.org/cgi-bin/carddisp.pl?gene=ECD
IFNLR1	Interferon Lambda Receptor 1	GC01M025787	1.17464	https://www.genecards.org/cgi-bin/carddisp.pl?gene=IFNLR1
IL22RA1	Interleukin 22 Receptor Subunit Alpha 1	GC01M024119	1.17464	https://www.genecards.org/cgi-bin/carddisp.pl?gene=IL22RA1
PDCD5	Programmed Cell Death 5	GC19P032581	1.00898	https://www.genecards.org/cgi-bin/carddisp.pl?gene=PDCD5
SENP3	SUMO Specific Peptidase 3	GC17P011458	0.966098	https://www.genecards.org/cgi-bin/carddisp.pl?gene=SENP3
CD207	CD207 Molecule	GC02M070830	0.321271	https://www.genecards.org/cgi-bin/carddisp.pl?gene=CD207
CCL24	C-C Motif Chemokine Ligand 24	GC07M076931	0.227173	https://www.genecards.org/cgi-bin/carddisp.pl?gene=CCL24
DHRS2	Dehydrogenase/Reductase 2	GC14P033606	0.227173	https://www.genecards.org/cgi-bin/carddisp.pl?gene=DHRS2
IL1RAPL2	Interleukin 1 Receptor Accessory Protein Like 2	GC0XP104566	0.227173	https://www.genecards.org/cgi-bin/carddisp.pl?gene=IL1RAPL2
PSIP1	PC4 And SFRS1 Interacting Protein 1	GC09M015464	0.227173	https://www.genecards.org/cgi-bin/carddisp.pl?gene=PSIP1
RNASE3	Ribonuclease A Family Member 3	GC14P020891	0.227173	https://www.genecards.org/cgi-bin/carddisp.pl?gene=RNASE3
AP1S3	Adaptor Related Protein Complex 1 Subunit Sigma 3	GC02M223667	8.86409	https://www.genecards.org/cgi-bin/carddisp.pl?gene=AP1S3
MICA	MHC Class I Polypeptide-Related Sequence A	GC06P031399	4.1721	https://www.genecards.org/cgi-bin/carddisp.pl?gene=MICA
TNIP1	TNFAIP3 Interacting Protein 1	GC05M151029	3.88569	https://www.genecards.org/cgi-bin/carddisp.pl?gene=TNIP1
KIR2DL1	Killer Cell Immunoglobulin Like Receptor, Two Ig Domains And Long Cytoplasmic Tail 1	GC19P070468	2.57442	https://www.genecards.org/cgi-bin/carddisp.pl?gene=KIR2DL1
IL36G	Interleukin 36 Gamma	GC02P112973	2.48388	https://www.genecards.org/cgi-bin/carddisp.pl?gene=IL36G
CAMP	Cathelicidin Antimicrobial Peptide	GC03P049753	1.82039	https://www.genecards.org/cgi-bin/carddisp.pl?gene=CAMP
KIR2DL3	Killer Cell Immunoglobulin Like Receptor, Two Ig Domains And Long Cytoplasmic Tail 3	GC19P071105	1.74818	https://www.genecards.org/cgi-bin/carddisp.pl?gene=KIR2DL3
KIR2DL4	Killer Cell Immunoglobulin Like Receptor, Two Ig Domains And Long Cytoplasmic Tail 4	GC19P070470	1.74818	https://www.genecards.org/cgi-bin/carddisp.pl?gene=KIR2DL4
LAMP3	Lysosomal Associated Membrane Protein 3	GC03M183122	1.65152	https://www.genecards.org/cgi-bin/carddisp.pl?gene=LAMP3
CCN1	Cellular Communication Network Factor 1	GC01P085581	1.51695	https://www.genecards.org/cgi-bin/carddisp.pl?gene=CCN1
S100A12	S100 Calcium Binding Protein A12	GC01M153373	1.40245	https://www.genecards.org/cgi-bin/carddisp.pl?gene=S100A12
BTNL2	Butyrophilin Like 2	GC06M032393	1.23615	https://www.genecards.org/cgi-bin/carddisp.pl?gene=BTNL2
CARD10	Caspase Recruitment Domain Family Member 10	GC22M059425	1.23615	https://www.genecards.org/cgi-bin/carddisp.pl?gene=CARD10
CARD8	Caspase Recruitment Domain Family Member 8	GC19M068109	1.23615	https://www.genecards.org/cgi-bin/carddisp.pl?gene=CARD8
IL33	Interleukin 33	GC09P007513	1.23615	https://www.genecards.org/cgi-bin/carddisp.pl?gene=IL33
AIF1	Allograft Inflammatory Factor 1	GC06P087730	1.17464	https://www.genecards.org/cgi-bin/carddisp.pl?gene=AIF1
ATF6B	Activating Transcription Factor 6 Beta	GC06M032115	1.17464	https://www.genecards.org/cgi-bin/carddisp.pl?gene=ATF6B
DCTN4	Dynactin Subunit 4	GC05M150708	1.17464	https://www.genecards.org/cgi-bin/carddisp.pl?gene=DCTN4
NCR3	Natural Cytotoxicity Triggering Receptor 3	GC06M031588	1.17464	https://www.genecards.org/cgi-bin/carddisp.pl?gene=NCR3
NDST2	N-Deacetylase And N-Sulfotransferase 2	GC10M073801	1.17464	https://www.genecards.org/cgi-bin/carddisp.pl?gene=NDST2
NFKBIZ	NFKB Inhibitor Zeta	GC03P101827	1.17464	https://www.genecards.org/cgi-bin/carddisp.pl?gene=NFKBIZ
P3H2	Prolyl 3-Hydroxylase 2	GC03M189956	1.17464	https://www.genecards.org/cgi-bin/carddisp.pl?gene=P3H2
PAPOLG	Poly(A) Polymerase Gamma	GC02P060756	1.17464	https://www.genecards.org/cgi-bin/carddisp.pl?gene=PAPOLG
PPP1R10	Protein Phosphatase 1 Regulatory Subunit 10	GC06M030600	1.17464	https://www.genecards.org/cgi-bin/carddisp.pl?gene=PPP1R10
SLC36A1	Solute Carrier Family 36 Member 1	GC05P151344	1.17464	https://www.genecards.org/cgi-bin/carddisp.pl?gene=SLC36A1
TUBE1	Tubulin Epsilon 1	GC06M112070	1.17464	https://www.genecards.org/cgi-bin/carddisp.pl?gene=TUBE1
ZNF436	Zinc Finger Protein 436	GC01M023359	1.17464	https://www.genecards.org/cgi-bin/carddisp.pl?gene=ZNF436
ACKR1	Atypical Chemokine Receptor 1 (Duffy Blood Group)	GC01P159203	1.00898	https://www.genecards.org/cgi-bin/carddisp.pl?gene=ACKR1
GTF3C4	General Transcription Factor IIIC Subunit 4	GC09P132671	0.966098	https://www.genecards.org/cgi-bin/carddisp.pl?gene=GTF3C4
PLXNB2	Plexin B2	GC22M050274	0.321271	https://www.genecards.org/cgi-bin/carddisp.pl?gene=PLXNB2
CD53	CD53 Molecule	GC01P110871	0.227173	https://www.genecards.org/cgi-bin/carddisp.pl?gene=CD53
CCHCR1	Coiled-Coil Alpha-Helical Rod Protein 1	GC06M069156	3.17632	https://www.genecards.org/cgi-bin/carddisp.pl?gene=CCHCR1
IL1F10	Interleukin 1 Family Member 10	GC02P113067	2.441	https://www.genecards.org/cgi-bin/carddisp.pl?gene=IL1F10
SLC12A8	Solute Carrier Family 12 Member 8	GC03M125082	2.14108	https://www.genecards.org/cgi-bin/carddisp.pl?gene=SLC12A8
CCL27	C-C Motif Chemokine Ligand 27	GC09M034662	1.98337	https://www.genecards.org/cgi-bin/carddisp.pl?gene=CCL27
IFNL1	Interferon Lambda 1	GC19P039296	1.61002	https://www.genecards.org/cgi-bin/carddisp.pl?gene=IFNL1
IL36A	Interleukin 36 Alpha	GC02P113005	1.4749	https://www.genecards.org/cgi-bin/carddisp.pl?gene=IL36A
IL17D	Interleukin 17D	GC13P020702	1.46333	https://www.genecards.org/cgi-bin/carddisp.pl?gene=IL17D
CCR10	C-C Motif Chemokine Receptor 10	GC17M042678	1.23615	https://www.genecards.org/cgi-bin/carddisp.pl?gene=CCR10
PI3	Peptidase Inhibitor 3	GC20P045174	1.23615	https://www.genecards.org/cgi-bin/carddisp.pl?gene=PI3
DYNLT1	Dynein Light Chain Tctex-Type 1	GC06M158636	1.17464	https://www.genecards.org/cgi-bin/carddisp.pl?gene=DYNLT1
GRHL3	Grainyhead Like Transcription Factor 3	GC01P024741	1.17464	https://www.genecards.org/cgi-bin/carddisp.pl?gene=GRHL3
ILF3	Interleukin Enhancer Binding Factor 3	GC19P010656	1.17464	https://www.genecards.org/cgi-bin/carddisp.pl?gene=ILF3
IRGM	Immunity Related GTPase M	GC05P150846	1.17464	https://www.genecards.org/cgi-bin/carddisp.pl?gene=IRGM
PPT2	Palmitoyl-Protein Thioesterase 2	GC06P032153	1.17464	https://www.genecards.org/cgi-bin/carddisp.pl?gene=PPT2
QTRT1	Queuine TRNA-Ribosyltransferase Catalytic Subunit 1	GC19P010701	1.17464	https://www.genecards.org/cgi-bin/carddisp.pl?gene=QTRT1
RBM22	RNA Binding Motif Protein 22	GC05M150690	1.17464	https://www.genecards.org/cgi-bin/carddisp.pl?gene=RBM22
RNF114	Ring Finger Protein 114	GC20P049936	1.17464	https://www.genecards.org/cgi-bin/carddisp.pl?gene=RNF114
SELENON	Selenoprotein N	GC01P025800	1.17464	https://www.genecards.org/cgi-bin/carddisp.pl?gene=SELENON
TAGAP	T Cell Activation RhoGTPase Activating Protein	GC06M159034	1.17464	https://www.genecards.org/cgi-bin/carddisp.pl?gene=TAGAP
MRAP	Melanocortin 2 Receptor Accessory Protein	GC21P032291	0.966098	https://www.genecards.org/cgi-bin/carddisp.pl?gene=MRAP
IFNK	Interferon Kappa	GC09P027514	0.393475	https://www.genecards.org/cgi-bin/carddisp.pl?gene=IFNK
IVL	Involucrin	GC01P152919	0.393475	https://www.genecards.org/cgi-bin/carddisp.pl?gene=IVL
FNDC5	Fibronectin Type III Domain Containing 5	GC01M033216	0.321271	https://www.genecards.org/cgi-bin/carddisp.pl?gene=FNDC5
DUSP19	Dual Specificity Phosphatase 19	GC02P183078	0.227173	https://www.genecards.org/cgi-bin/carddisp.pl?gene=DUSP19
SUMO4	Small Ubiquitin Like Modifier 4	GC06P149401	1.98337	https://www.genecards.org/cgi-bin/carddisp.pl?gene=SUMO4
IL36B	Interleukin 36 Beta	GC02M113022	1.4749	https://www.genecards.org/cgi-bin/carddisp.pl?gene=IL36B
ARL8B	ADP Ribosylation Factor Like GTPase 8B	GC03P005122	1.17464	https://www.genecards.org/cgi-bin/carddisp.pl?gene=ARL8B
PLCL2	Phospholipase C Like 2	GC03P017273	1.17464	https://www.genecards.org/cgi-bin/carddisp.pl?gene=PLCL2
TRMT112	TRNA Methyltransferase Activator Subunit 11-2	GC11M064316	1.17464	https://www.genecards.org/cgi-bin/carddisp.pl?gene=TRMT112
CLMN	Calmin	GC14M095181	0.966098	https://www.genecards.org/cgi-bin/carddisp.pl?gene=CLMN
GTF3C1	General Transcription Factor IIIC Subunit 1	GC16M027471	0.966098	https://www.genecards.org/cgi-bin/carddisp.pl?gene=GTF3C1
GTF3C2	General Transcription Factor IIIC Subunit 2	GC02M027325	0.966098	https://www.genecards.org/cgi-bin/carddisp.pl?gene=GTF3C2
TRIM13	Tripartite Motif Containing 13	GC13P049995	0.966098	https://www.genecards.org/cgi-bin/carddisp.pl?gene=TRIM13
IFNL3	Interferon Lambda 3	GC19M039243	1.23615	https://www.genecards.org/cgi-bin/carddisp.pl?gene=IFNL3
ABHD16A	Abhydrolase Domain Containing 16A, Phospholipase	GC06M069216	1.17464	https://www.genecards.org/cgi-bin/carddisp.pl?gene=ABHD16A
LST1	Leukocyte Specific Transcript 1	GC06P087732	1.17464	https://www.genecards.org/cgi-bin/carddisp.pl?gene=LST1
MYOZ1	Myozenin 1	GC10M073631	1.17464	https://www.genecards.org/cgi-bin/carddisp.pl?gene=MYOZ1
NFKBIL1	NFKB Inhibitor Like 1	GC06P087727	1.17464	https://www.genecards.org/cgi-bin/carddisp.pl?gene=NFKBIL1
PNRC2	Proline Rich Nuclear Receptor Coactivator 2	GC01P024695	1.17464	https://www.genecards.org/cgi-bin/carddisp.pl?gene=PNRC2
PUS10	Pseudouridine Synthase 10	GC02M060940	1.17464	https://www.genecards.org/cgi-bin/carddisp.pl?gene=PUS10
RNF145	Ring Finger Protein 145	GC05M159157	1.17464	https://www.genecards.org/cgi-bin/carddisp.pl?gene=RNF145
RSPH3	Radial Spoke Head 3	GC06M158962	1.17464	https://www.genecards.org/cgi-bin/carddisp.pl?gene=RSPH3
ZC3H12C	Zinc Finger CCCH-Type Containing 12C	GC11P110092	1.17464	https://www.genecards.org/cgi-bin/carddisp.pl?gene=ZC3H12C
ZNF300	Zinc Finger Protein 300	GC05M150894	1.17464	https://www.genecards.org/cgi-bin/carddisp.pl?gene=ZNF300
SDR16C5	Short Chain Dehydrogenase/Reductase Family 16C Member 5	GC08M056300	0.454346	https://www.genecards.org/cgi-bin/carddisp.pl?gene=SDR16C5
CRNN	Cornulin	GC01M152422	0.321271	https://www.genecards.org/cgi-bin/carddisp.pl?gene=CRNN
ADAMTSL5	ADAMTS Like 5	GC19M005908	0.227173	https://www.genecards.org/cgi-bin/carddisp.pl?gene=ADAMTSL5
FLG2	Filaggrin 2	GC01M152356	0.227173	https://www.genecards.org/cgi-bin/carddisp.pl?gene=FLG2
TXNRD3	Thioredoxin Reductase 3	GC03M126577	0.227173	https://www.genecards.org/cgi-bin/carddisp.pl?gene=TXNRD3
DEFB4A	Defensin Beta 4A	GC08P007895	1.98337	https://www.genecards.org/cgi-bin/carddisp.pl?gene=DEFB4A
ACTL7B	Actin Like 7B	GC09M108854	1.17464	https://www.genecards.org/cgi-bin/carddisp.pl?gene=ACTL7B
EGFL8	EGF Like Domain Multiple 8	GC06P087766	1.17464	https://www.genecards.org/cgi-bin/carddisp.pl?gene=EGFL8
FNDC1	Fibronectin Type III Domain Containing 1	GC06P160656	1.17464	https://www.genecards.org/cgi-bin/carddisp.pl?gene=FNDC1
TMEM79	Transmembrane Protein 79	GC01P156252	0.966098	https://www.genecards.org/cgi-bin/carddisp.pl?gene=TMEM79
CARMIL2	Capping Protein Regulator And Myosin 1 Linker 2	GC16P067644	0.454346	https://www.genecards.org/cgi-bin/carddisp.pl?gene=CARMIL2
TSPAN32	Tetraspanin 32	GC11P002302	0.227173	https://www.genecards.org/cgi-bin/carddisp.pl?gene=TSPAN32
ZNF750	Zinc Finger Protein 750	GC17M082829	0.227173	https://www.genecards.org/cgi-bin/carddisp.pl?gene=ZNF750
FBXL19	F-Box And Leucine Rich Repeat Protein 19	GC16P041939	2.14074	https://www.genecards.org/cgi-bin/carddisp.pl?gene=FBXL19
KIR2DS4	Killer Cell Immunoglobulin Like Receptor, Two Ig Domains And Short Cytoplasmic Tail 4	GC19P070472	1.74818	https://www.genecards.org/cgi-bin/carddisp.pl?gene=KIR2DS4
KIR3DL3	Killer Cell Immunoglobulin Like Receptor, Three Ig Domains And Long Cytoplasmic Tail 3	GC19P071106	1.74818	https://www.genecards.org/cgi-bin/carddisp.pl?gene=KIR3DL3
RNASE7	Ribonuclease A Family Member 7	GC14P021042	1.23615	https://www.genecards.org/cgi-bin/carddisp.pl?gene=RNASE7
CCDC69	Coiled-Coil Domain Containing 69	GC05M151181	1.17464	https://www.genecards.org/cgi-bin/carddisp.pl?gene=CCDC69
FUT11	Fucosyltransferase 11	GC10P073772	1.17464	https://www.genecards.org/cgi-bin/carddisp.pl?gene=FUT11
NUFIP1	Nuclear FMR1 Interacting Protein 1	GC13M044939	1.17464	https://www.genecards.org/cgi-bin/carddisp.pl?gene=NUFIP1
PRSS53	Serine Protease 53	GC16M037880	1.17464	https://www.genecards.org/cgi-bin/carddisp.pl?gene=PRSS53
RAVER1	Ribonucleoprotein, PTB Binding 1	GC19M010316	1.17464	https://www.genecards.org/cgi-bin/carddisp.pl?gene=RAVER1
RMI2	RecQ Mediated Genome Instability 2	GC16P012941	1.17464	https://www.genecards.org/cgi-bin/carddisp.pl?gene=RMI2
ZSWIM8	Zinc Finger SWIM-Type Containing 8	GC10P073785	1.17464	https://www.genecards.org/cgi-bin/carddisp.pl?gene=ZSWIM8
TCHHL1	Trichohyalin Like 1	GC01M152492	0.227173	https://www.genecards.org/cgi-bin/carddisp.pl?gene=TCHHL1
PSORS1C2	Psoriasis Susceptibility 1 Candidate 2	GC06M031137	6.51344	https://www.genecards.org/cgi-bin/carddisp.pl?gene=PSORS1C2
YDJC	YdjC Chitooligosaccharide Deacetylase Homolog	GC22M021628	2.14074	https://www.genecards.org/cgi-bin/carddisp.pl?gene=YDJC
CFAP70	Cilia And Flagella Associated Protein 70	GC10M073253	1.17464	https://www.genecards.org/cgi-bin/carddisp.pl?gene=CFAP70
LY6G5B	Lymphocyte Antigen 6 Family Member G5B	GC06P087744	1.17464	https://www.genecards.org/cgi-bin/carddisp.pl?gene=LY6G5B
SYF2	SYF2 Pre-MRNA Splicing Factor	GC01M025222	1.17464	https://www.genecards.org/cgi-bin/carddisp.pl?gene=SYF2
ZBTB12	Zinc Finger And BTB Domain Containing 12	GC06M031899	1.17464	https://www.genecards.org/cgi-bin/carddisp.pl?gene=ZBTB12
LORICRIN	Loricrin Cornified Envelope Precursor Protein	GC01P153262	0.321271	https://www.genecards.org/cgi-bin/carddisp.pl?gene=LORICRIN
PSORS1C1	Psoriasis Susceptibility 1 Candidate 1	GC06P031114	3.355	https://www.genecards.org/cgi-bin/carddisp.pl?gene=PSORS1C1
LYNX1	Ly6/Neurotoxin 1	GC08M143025	1.74818	https://www.genecards.org/cgi-bin/carddisp.pl?gene=LYNX1
CCDC88B	Coiled-Coil Domain Containing 88B	GC11P064340	1.17464	https://www.genecards.org/cgi-bin/carddisp.pl?gene=CCDC88B
MFSD4B	Major Facilitator Superfamily Domain Containing 4B	GC06P111460	1.17464	https://www.genecards.org/cgi-bin/carddisp.pl?gene=MFSD4B
PRR3	Proline Rich 3	GC06P087701	1.17464	https://www.genecards.org/cgi-bin/carddisp.pl?gene=PRR3
MT-CO1	Mitochondrially Encoded Cytochrome C Oxidase I	GCMTP005906	0.966098	https://www.genecards.org/cgi-bin/carddisp.pl?gene=MT-CO1
C6orf15	Chromosome 6 Open Reading Frame 15	GC06M031111	2.18036	https://www.genecards.org/cgi-bin/carddisp.pl?gene=C6orf15
RSRP1	Arginine And Serine Rich Protein 1	GC01M025242	1.17464	https://www.genecards.org/cgi-bin/carddisp.pl?gene=RSRP1
SANBR	SANT And BTB Domain Regulator Of CSR	GC02P061068	1.17464	https://www.genecards.org/cgi-bin/carddisp.pl?gene=SANBR
SAPCD1	Suppressor APC Domain Containing 1	GC06P087757	1.17464	https://www.genecards.org/cgi-bin/carddisp.pl?gene=SAPCD1
LCE3C	Late Cornified Envelope 3C	GC01P152600	3.90644	https://www.genecards.org/cgi-bin/carddisp.pl?gene=LCE3C
LCE3D	Late Cornified Envelope 3D	GC01M152579	1.40245	https://www.genecards.org/cgi-bin/carddisp.pl?gene=LCE3D
SMIM3	Small Integral Membrane Protein 3	GC05P150777	1.17464	https://www.genecards.org/cgi-bin/carddisp.pl?gene=SMIM3
LILRA3	Leukocyte Immunoglobulin Like Receptor A3	GC19Mp00270	0.393475	https://www.genecards.org/cgi-bin/carddisp.pl?gene=LILRA3
LCE3A	Late Cornified Envelope 3A	GC01M152595	3.54319	https://www.genecards.org/cgi-bin/carddisp.pl?gene=LCE3A
HLA-DRB3	Major Histocompatibility Complex, Class II, DR Beta 3	GC06Mn03715	1.33025	https://www.genecards.org/cgi-bin/carddisp.pl?gene=HLA-DRB3
DEFB103B	Defensin Beta 103B	GC08M007430	1.23615	https://www.genecards.org/cgi-bin/carddisp.pl?gene=DEFB103B
AGAP5	ArfGAP With GTPase Domain, Ankyrin Repeat And PH Domain 5	GC10M073937	1.17464	https://www.genecards.org/cgi-bin/carddisp.pl?gene=AGAP5
C10orf55	Chromosome 10 Putative Open Reading Frame 55	GC10M073909	1.17464	https://www.genecards.org/cgi-bin/carddisp.pl?gene=C10orf55
PRM3	Protamine 3	GC16M011273	1.17464	https://www.genecards.org/cgi-bin/carddisp.pl?gene=PRM3
C1orf141	Chromosome 1 Open Reading Frame 141	GC01M067092	2.64954	https://www.genecards.org/cgi-bin/carddisp.pl?gene=C1orf141
LCE2B	Late Cornified Envelope 2B	GC01P152686	2.441	https://www.genecards.org/cgi-bin/carddisp.pl?gene=LCE2B
SPRR4	Small Proline Rich Protein 4	GC01P152970	2.441	https://www.genecards.org/cgi-bin/carddisp.pl?gene=SPRR4
HLA-DRB4	Major Histocompatibility Complex, Class II, DR Beta 4	GC06Mo03851	1.88126	https://www.genecards.org/cgi-bin/carddisp.pl?gene=HLA-DRB4
LCE1B	Late Cornified Envelope 1B	GC01P152811	1.40245	https://www.genecards.org/cgi-bin/carddisp.pl?gene=LCE1B
LCE1C	Late Cornified Envelope 1C	GC01M152778	1.51695	https://www.genecards.org/cgi-bin/carddisp.pl?gene=LCE1C
LINC02693	Long Intergenic Non-Protein Coding RNA 2693	GC17M026460	0.966098	https://www.genecards.org/cgi-bin/carddisp.pl?gene=LINC02693
LCE3B	Late Cornified Envelope 3B	GC01P152613	5.02021	https://www.genecards.org/cgi-bin/carddisp.pl?gene=LCE3B
KIR2DL2	Killer Cell Immunoglobulin Like Receptor, Two Ig Domains And Long Cytoplasmic Tail 2	GC19Mr00108	2.4723	https://www.genecards.org/cgi-bin/carddisp.pl?gene=KIR2DL2
KIR2DS2	Killer Cell Immunoglobulin Like Receptor, Two Ig Domains And Short Cytoplasmic Tail 2	GC19MR00122	1.74818	https://www.genecards.org/cgi-bin/carddisp.pl?gene=KIR2DS2
KIR2DS1	Killer Cell Immunoglobulin Like Receptor, Two Ig Domains And Short Cytoplasmic Tail 1	GC19Mr00063	3.38789	https://www.genecards.org/cgi-bin/carddisp.pl?gene=KIR2DS1
KIR2DL5A	Killer Cell Immunoglobulin Like Receptor, Two Ig Domains And Long Cytoplasmic Tail 5A	GC19MR00046	2.4723	https://www.genecards.org/cgi-bin/carddisp.pl?gene=KIR2DL5A
KIR3DS1	Killer Cell Immunoglobulin Like Receptor, Three Ig Domains And Short Cytoplasmic Tail 1	GC19MR00058	2.14108	https://www.genecards.org/cgi-bin/carddisp.pl?gene=KIR3DS1
HCG22	HLA Complex Group 22 (Gene/Pseudogene)	GC06P031053	1.17464	https://www.genecards.org/cgi-bin/carddisp.pl?gene=HCG22
MUC22	Mucin 22	GC06P031005	1.17464	https://www.genecards.org/cgi-bin/carddisp.pl?gene=MUC22
PSORS1C3	Psoriasis Susceptibility 1 Candidate 3	GC06M069158	4.05811	https://www.genecards.org/cgi-bin/carddisp.pl?gene=PSORS1C3
TRB	T Cell Receptor Beta Locus	GC07P149825	1.97478	https://www.genecards.org/cgi-bin/carddisp.pl?gene=TRB
KIR2DS5	Killer Cell Immunoglobulin Like Receptor, Two Ig Domains And Short Cytoplasmic Tail 5	GC19Mr00079	1.82039	https://www.genecards.org/cgi-bin/carddisp.pl?gene=KIR2DS5
KIR2DS3	Killer Cell Immunoglobulin Like Receptor, Two Ig Domains And Short Cytoplasmic Tail 3	GC19ME00037	1.74818	https://www.genecards.org/cgi-bin/carddisp.pl?gene=KIR2DS3
MIR210	MicroRNA 210	GC11M003894	1.23615	https://www.genecards.org/cgi-bin/carddisp.pl?gene=MIR210
EGOT	Eosinophil Granule Ontogeny Transcript	GC03M004790	1.17464	https://www.genecards.org/cgi-bin/carddisp.pl?gene=EGOT
TDGF1P3	Teratocarcinoma-Derived Growth Factor 1 Pseudogene 3	GC0XP110520	0.227173	https://www.genecards.org/cgi-bin/carddisp.pl?gene=TDGF1P3
MIR138-1	MicroRNA 138-1	GC03P044115	1.23615	https://www.genecards.org/cgi-bin/carddisp.pl?gene=MIR138-1
MIR200A	MicroRNA 200a	GC01P004110	1.23615	https://www.genecards.org/cgi-bin/carddisp.pl?gene=MIR200A
MIR31	MicroRNA 31	GC09M021793	1.00898	https://www.genecards.org/cgi-bin/carddisp.pl?gene=MIR31
TRAF3IP2-AS1	TRAF3IP2 Antisense RNA 1	GC06P111483	2.59508	https://www.genecards.org/cgi-bin/carddisp.pl?gene=TRAF3IP2-AS1
HCG27	HLA Complex Group 27	GC06P031197	1.17464	https://www.genecards.org/cgi-bin/carddisp.pl?gene=HCG27
SLURP2	Secreted LY6/PLAUR Domain Containing 2	GC08M143024	2.14108	https://www.genecards.org/cgi-bin/carddisp.pl?gene=SLURP2
DNAJC9-AS1	DNAJC9 And MRPS16 Antisense RNA 1	GC10P073247	1.17464	https://www.genecards.org/cgi-bin/carddisp.pl?gene=DNAJC9-AS1
HCG18	HLA Complex Group 18	GC06M069112	1.17464	https://www.genecards.org/cgi-bin/carddisp.pl?gene=HCG18
BHLHE40-AS1	BHLHE40 Antisense RNA 1	GC03M004897	1.17464	https://www.genecards.org/cgi-bin/carddisp.pl?gene=BHLHE40-AS1
LINC01355	Long Intergenic Non-Protein Coding RNA 1355	GC01M023281	1.17464	https://www.genecards.org/cgi-bin/carddisp.pl?gene=LINC01355
AP4B1-AS1	AP4B1 Antisense RNA 1	GC01P113813	1.00898	https://www.genecards.org/cgi-bin/carddisp.pl?gene=AP4B1-AS1
REL-DT	REL Divergent Transcript	GC02M060822	1.40181	https://www.genecards.org/cgi-bin/carddisp.pl?gene=REL-DT
LINC00330	Long Intergenic Non-Protein Coding RNA 330	GC13M044947	1.17464	https://www.genecards.org/cgi-bin/carddisp.pl?gene=LINC00330
LINC00407	Long Intergenic Non-Protein Coding RNA 407	GC13P044651	1.17464	https://www.genecards.org/cgi-bin/carddisp.pl?gene=LINC00407
LINC02202	Long Intergenic Non-Protein Coding RNA 2202	GC05P159101	1.17464	https://www.genecards.org/cgi-bin/carddisp.pl?gene=LINC02202
MIR4425	MicroRNA 4425	GC01P025023	1.17464	https://www.genecards.org/cgi-bin/carddisp.pl?gene=MIR4425
RDUR	RIG-I Dependent Antiviral Response Regulator RNA	GC03P101942	1.17464	https://www.genecards.org/cgi-bin/carddisp.pl?gene=RDUR
TH2LCRR	T Helper Type 2 Locus Control Region Associated RNA	GC05M132631	1.17464	https://www.genecards.org/cgi-bin/carddisp.pl?gene=TH2LCRR
ZNF300P1	Zinc Finger Protein 300 Pseudogene 1	GC05M150930	1.17464	https://www.genecards.org/cgi-bin/carddisp.pl?gene=ZNF300P1
LINC02800	Long Intergenic Non-Protein Coding RNA 2800	GC01P024716	1.17464	https://www.genecards.org/cgi-bin/carddisp.pl?gene=LINC02800
LOC285626	Uncharacterized LOC285626	GC05P159342	1.40181	https://www.genecards.org/cgi-bin/carddisp.pl?gene=LOC285626
TAGAP-AS1	TAGAP Antisense RNA 1	GC06P160785	1.17464	https://www.genecards.org/cgi-bin/carddisp.pl?gene=TAGAP-AS1
LINC01845	Long Intergenic Non-Protein Coding RNA 1845	GC05M159448	1.17464	https://www.genecards.org/cgi-bin/carddisp.pl?gene=LINC01845
LINC02528	Long Intergenic Non-Protein Coding RNA 2528	GC06M137945	1.17464	https://www.genecards.org/cgi-bin/carddisp.pl?gene=LINC02528
KIR2DP1	Killer Cell Immunoglobulin Like Receptor, Two Ig Domains Pseudogene 1	GC19P070467	1.74818	https://www.genecards.org/cgi-bin/carddisp.pl?gene=KIR2DP1
RPL3P2	Ribosomal Protein L3 Pseudogene 2	GC06P031280	1.40181	https://www.genecards.org/cgi-bin/carddisp.pl?gene=RPL3P2
ENSG00000235978	Novel Transcript, Antisense To ITPR1	GC03M004793	1.17464	https://www.genecards.org/cgi-bin/carddisp.pl?gene=ENSG00000235978
LINC02571	Long Intergenic Non-Protein Coding RNA 2571	GC06M069171	1.17464	https://www.genecards.org/cgi-bin/carddisp.pl?gene=LINC02571
LOC102723878	Uncharacterized LOC102723878	GC11M064325	1.17464	https://www.genecards.org/cgi-bin/carddisp.pl?gene=LOC102723878
LOC112267968	Uncharacterized LOC112267968	GC06M159053	1.17464	https://www.genecards.org/cgi-bin/carddisp.pl?gene=LOC112267968
RUNX3-AS1	RUNX3 Antisense RNA 1	GC01P025026	1.17464	https://www.genecards.org/cgi-bin/carddisp.pl?gene=RUNX3-AS1
CAMK2G-AS1	CAMK2G Antisense RNA 1	GC10P074206	1.17464	https://www.genecards.org/cgi-bin/carddisp.pl?gene=CAMK2G-AS1
DUSP8P5	Dual Specificity Phosphatase 8 Pseudogene 5	GC10P073731	1.17464	https://www.genecards.org/cgi-bin/carddisp.pl?gene=DUSP8P5
ENSG00000227540	DNAJC9 And MRPS16 Antisense RNA 1	GC10P073253	1.17464	https://www.genecards.org/cgi-bin/carddisp.pl?gene=ENSG00000227540
ENSG00000268584	Novel Transcript, Antisense To USP54	GC10P073601	1.17464	https://www.genecards.org/cgi-bin/carddisp.pl?gene=ENSG00000268584
ENSG00000272791	Novel Transcript	GC10P073630	1.17464	https://www.genecards.org/cgi-bin/carddisp.pl?gene=ENSG00000272791
RPL7P1	Ribosomal Protein L7 Pseudogene 1	GC05P150094	1.17464	https://www.genecards.org/cgi-bin/carddisp.pl?gene=RPL7P1
